# Supplementary material for: Spiroindolone Analogues as Potential Hypoglycemic with Dual Inhibitory Activity on α-Amylase and α-Glucosidase
Source: PubMed Central journal article supplement (PMC6630796; doi:10.3390/molecules24122342), 2019-06-25
Supplement: molecules-24-02342-s001.pdf [file molecules-24-02342-s001.pdf]

## SUPPORTING INFORMATION

# Spiroindolone Analogues as Potential Hypoglycemic with Dual Inhibitory Activity on $\alpha$ -Amylase and $\alpha$ -Glucosidase

Mezna Saleh Altowyan <sup>1</sup>, Assem Barakat <sup>2,3,\*</sup>, Abdullah Mohammed Al-Majid <sup>2</sup> and H.A.Al-Ghulikah <sup>1</sup>

- <sup>1</sup> Department of Chemistry, College of Science, Princess Nourah Bint Abdulrahman University, Riyadh, Saudi Arabia; msaltowyan@pnu.edu.sa (M.S.A); haaalghulikah@pnu.edu.sa (H.A.Al-G).
  - <sup>2</sup> Department of Chemistry, College of Science, King Saud University, P. O. Box 2455, Riyadh 11451, Saudi Arabia. amajid@ksu.edu.sa (A.M.A)
  - <sup>3</sup> Department of Chemistry, Faculty of Science, Alexandria University, P.O. Box 426, Ibrahimia, Alexandria 21321, Egypt.
- \* Correspondence: ambarakat@ksu.edu.sa. Tel.: +966-11467-5901; Fax: +966-11467-5992.

### Table of Contents

Copies of the <sup>1</sup>H-NMR, and <sup>13</sup>C-NMR spectra for the starting material chalcones **2a-f** and the target compounds **5a-r**. Copies of select IR spectra.

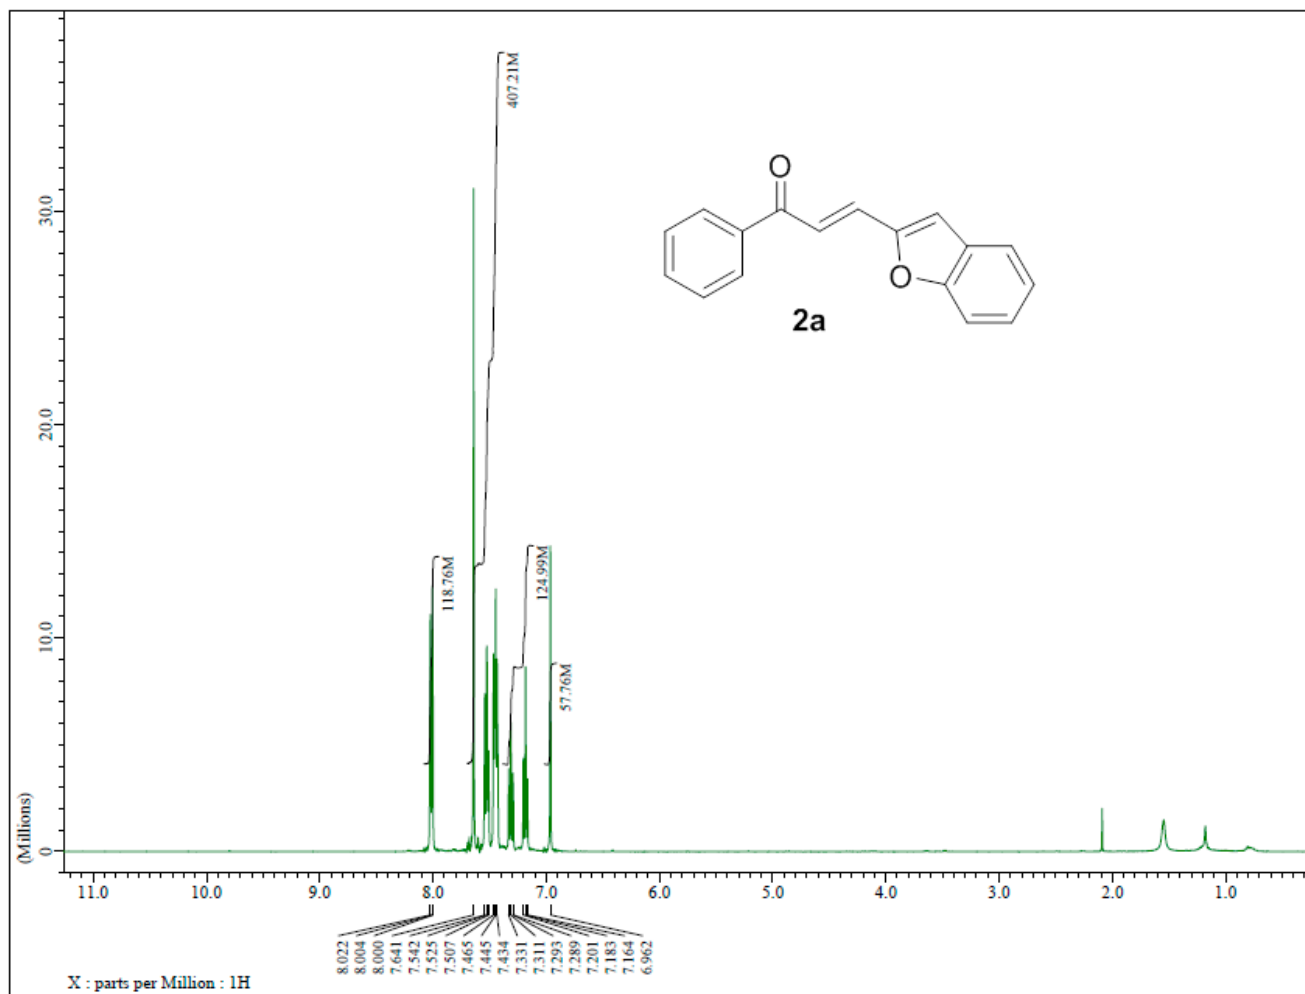

Figure S1.  $^1\text{H-NMR}$  (400 MHz,  $\text{CDCl}_3$ ) of compound **2a**

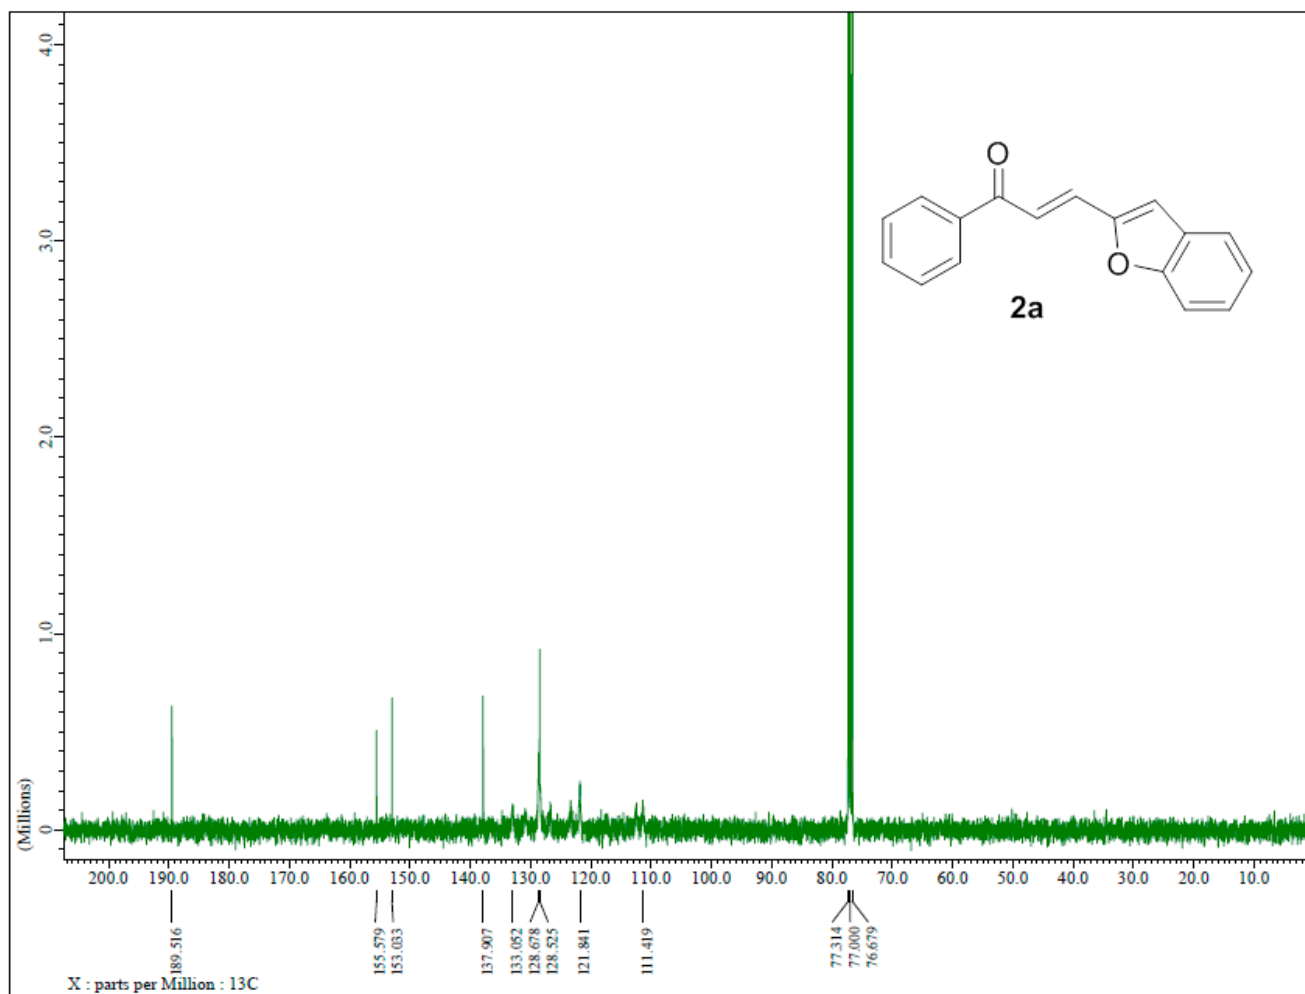

Figure S2.  $^{13}\text{C}$ -NMR (100 MHz,  $\text{CDCl}_3$ ) of compound 2a

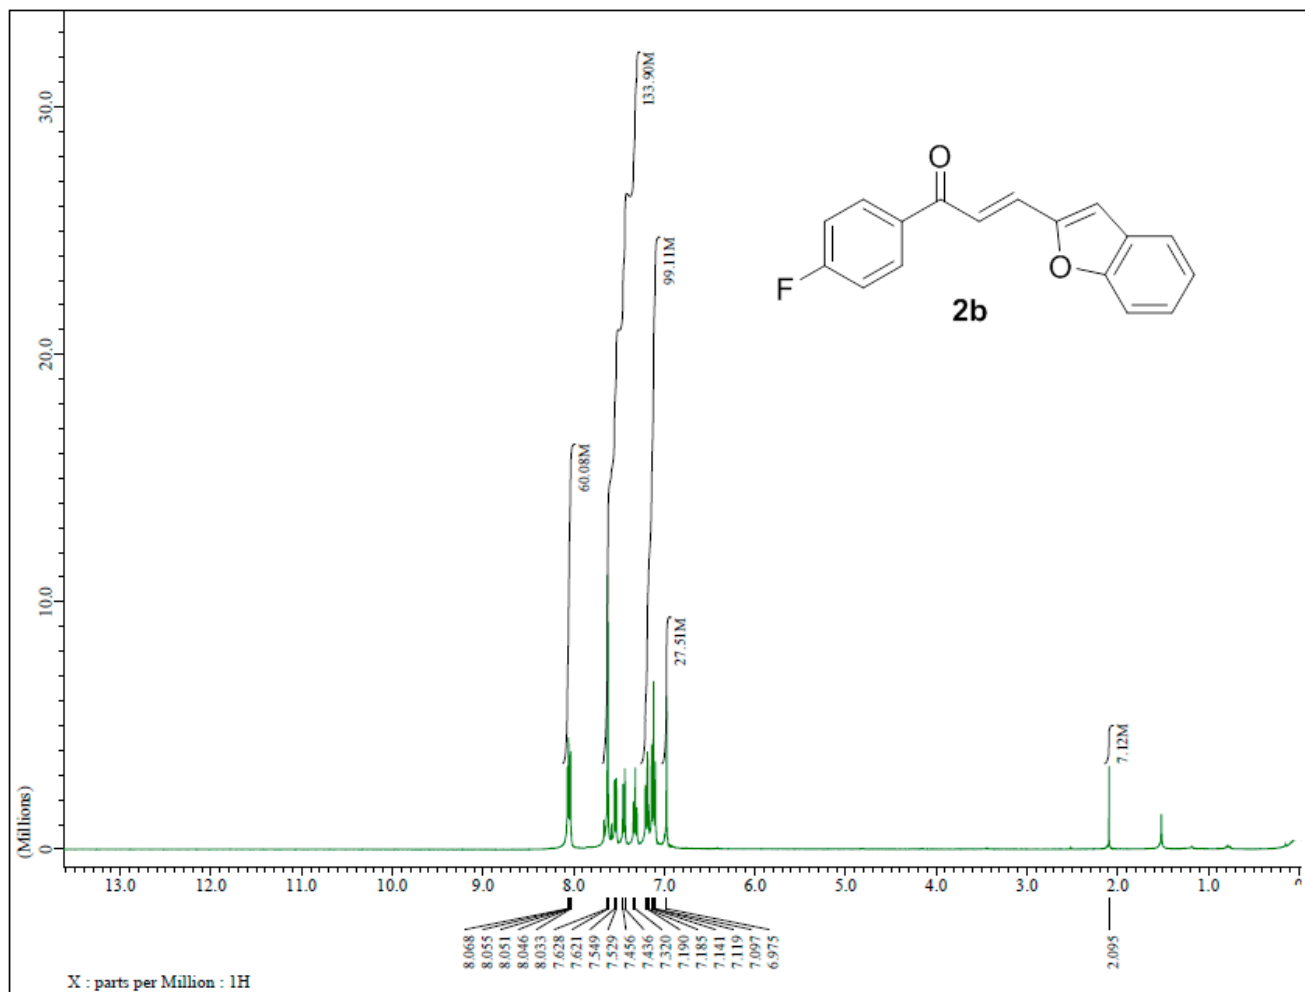

Figure S3. <sup>1</sup>H-NMR (400 MHz, CDCl<sub>3</sub>) of compound **2b**

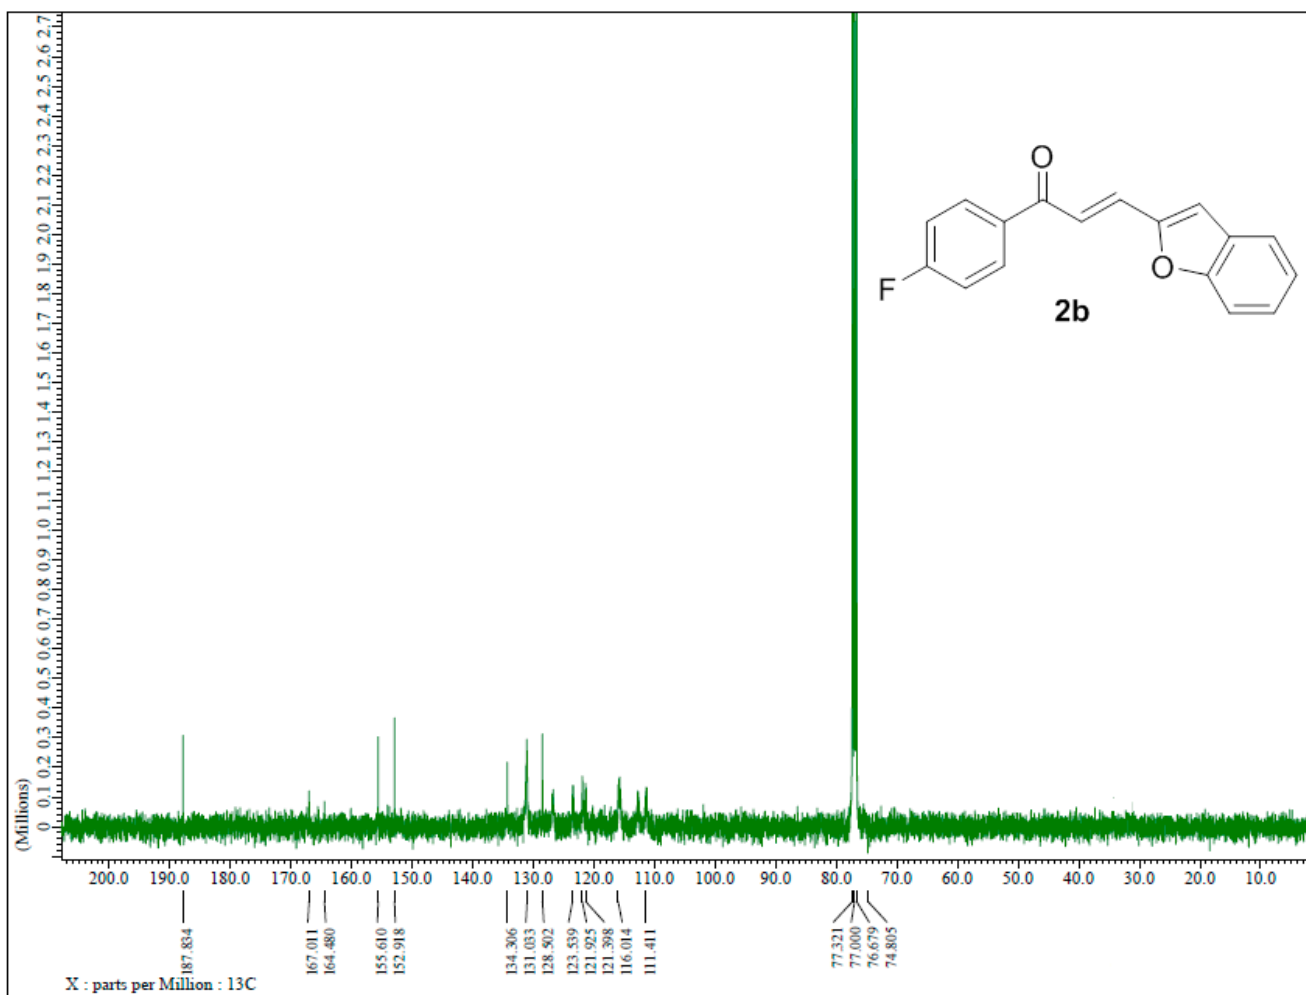

**Figure S4.**  $^{13}\text{C}$ -NMR (100 MHz,  $\text{CDCl}_3$ ) of compound **2b**

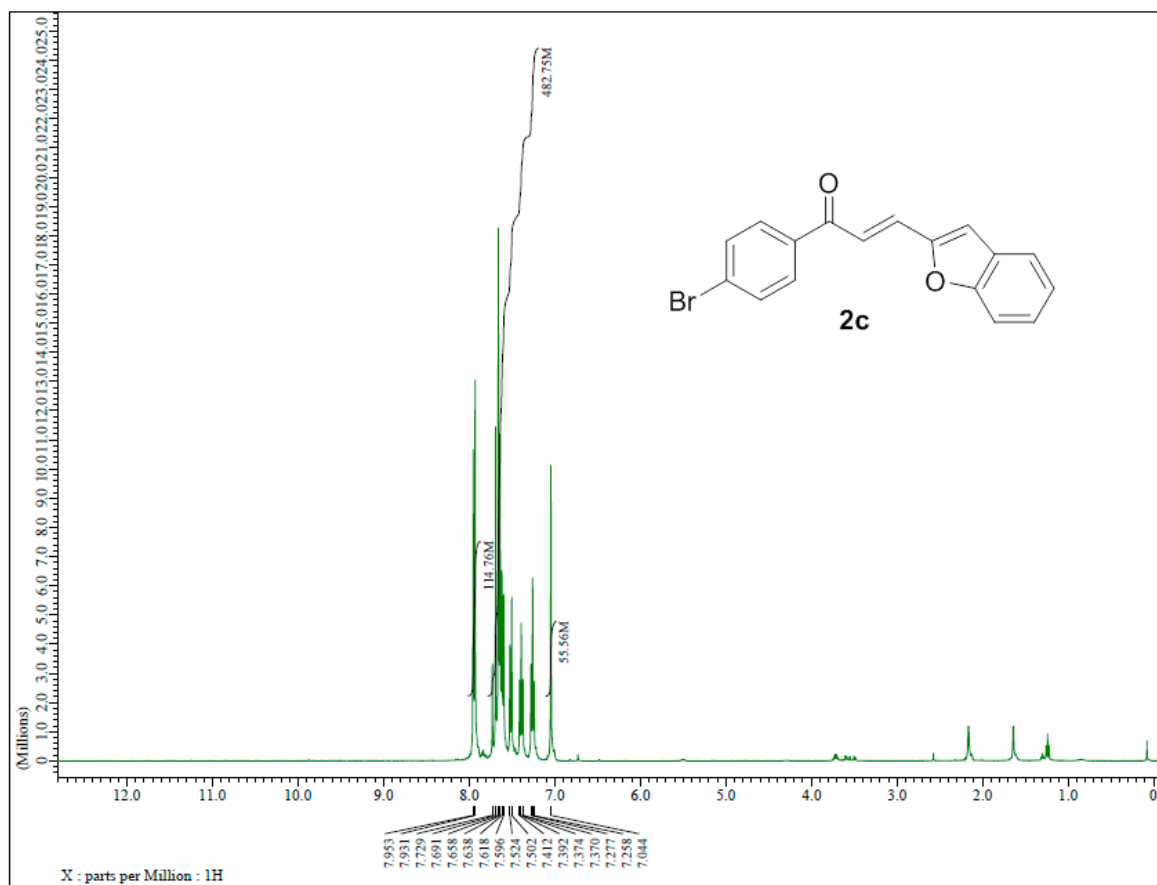

Figure S5. <sup>1</sup>H-NMR (400 MHz, CDCl<sub>3</sub>) of compound 2c

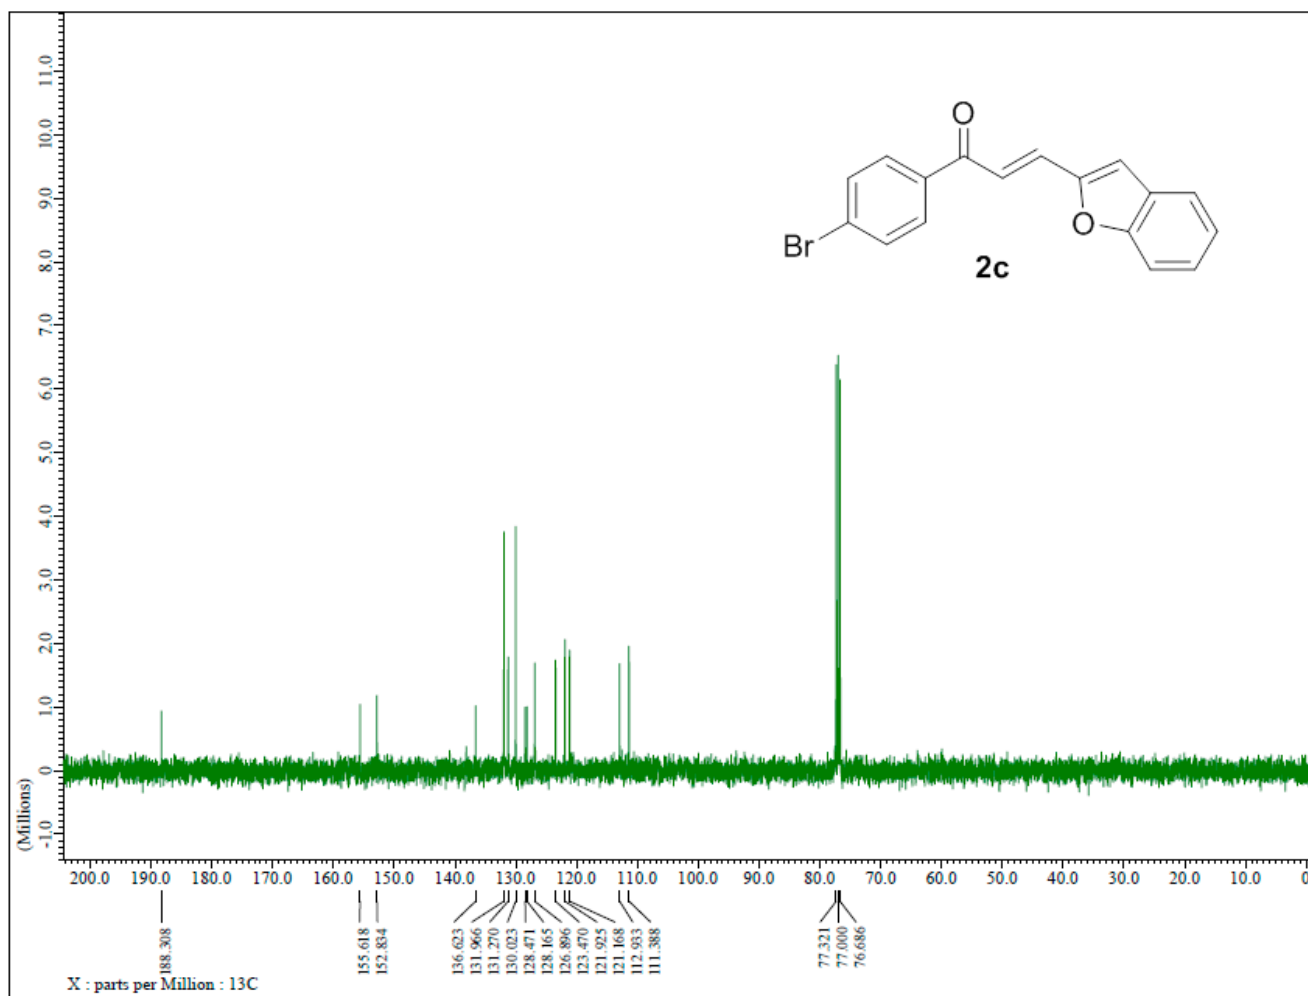

Figure S6. <sup>13</sup>C-NMR (100 MHz, CDCl<sub>3</sub>) of compound 2c

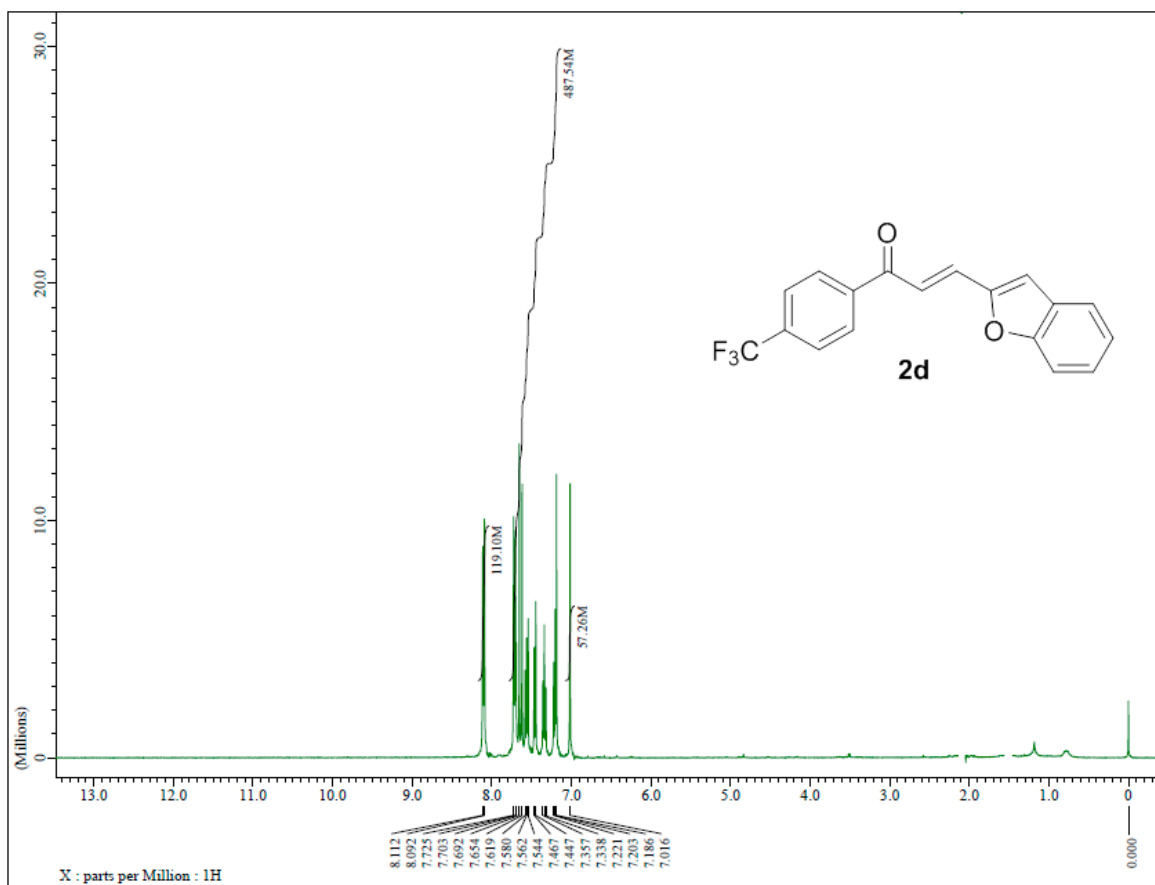

Figure S7. <sup>1</sup>H-NMR (400 MHz, CDCl<sub>3</sub>) of compound **2d**



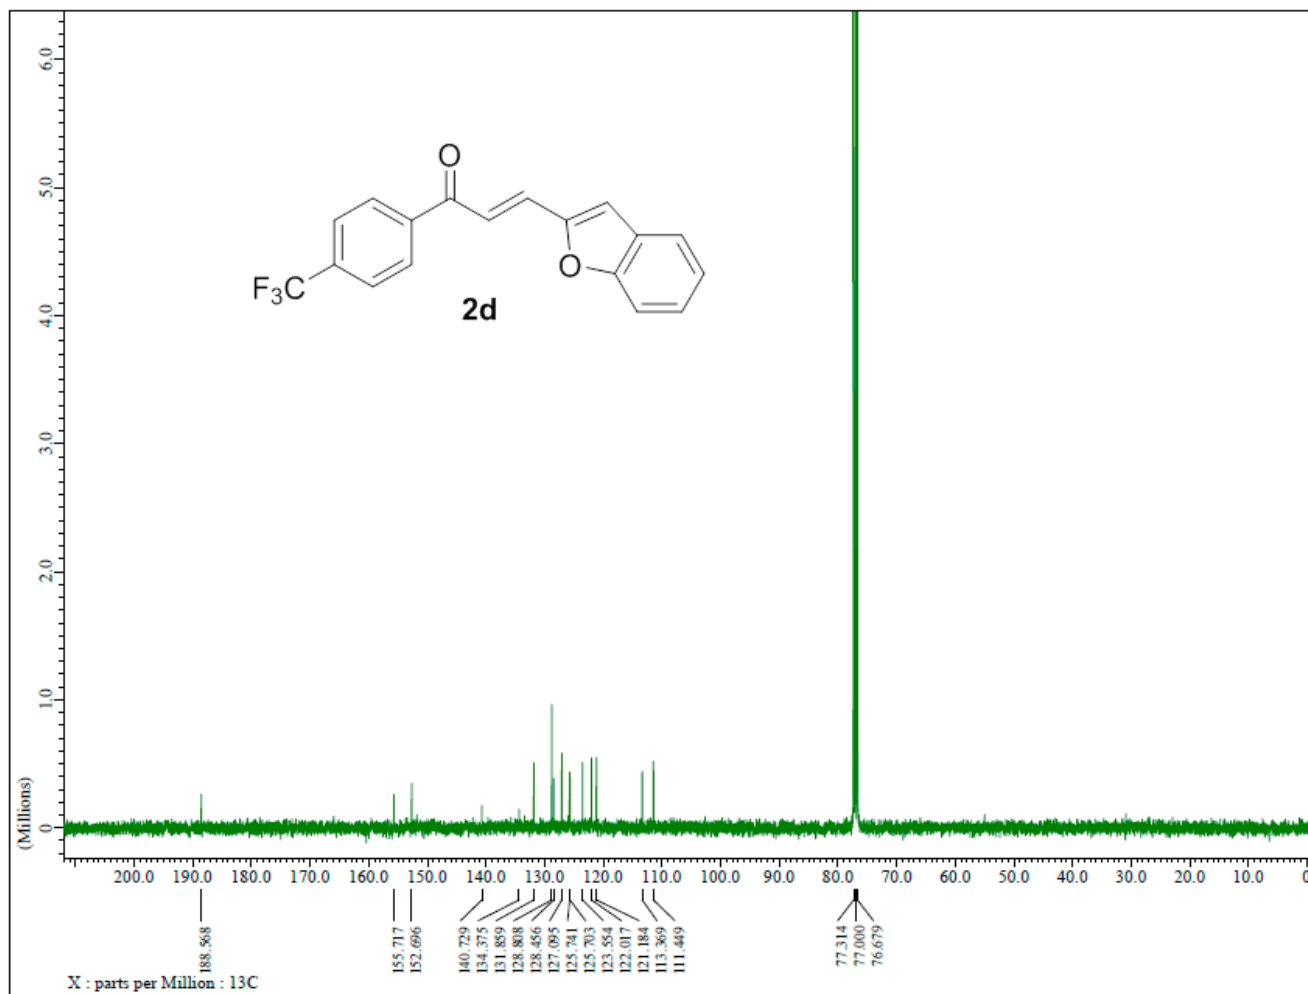

**Figure S8.** <sup>13</sup>C-NMR (100 MHz, CDCl<sub>3</sub>) of compound **2d**

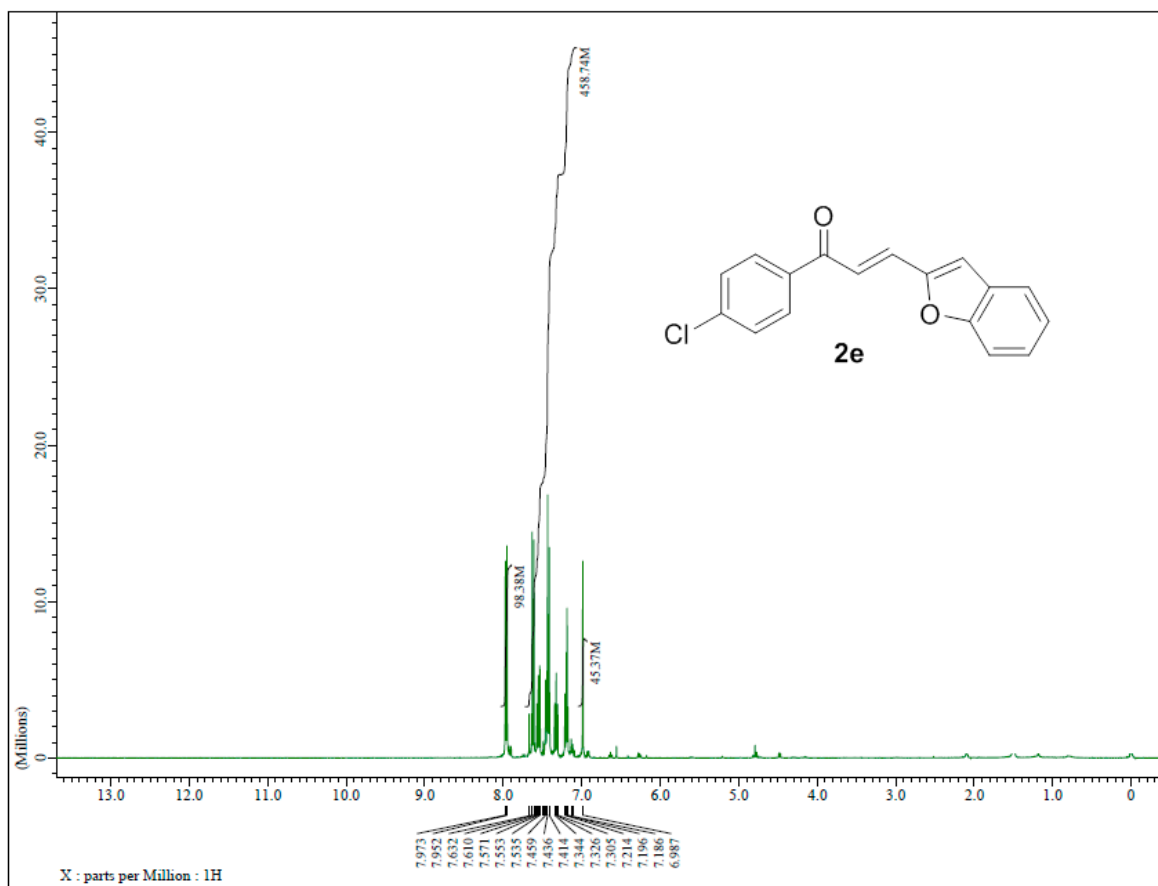

Figure S9. <sup>1</sup>H-NMR (400 MHz, CDCl<sub>3</sub>) of compound **2e**

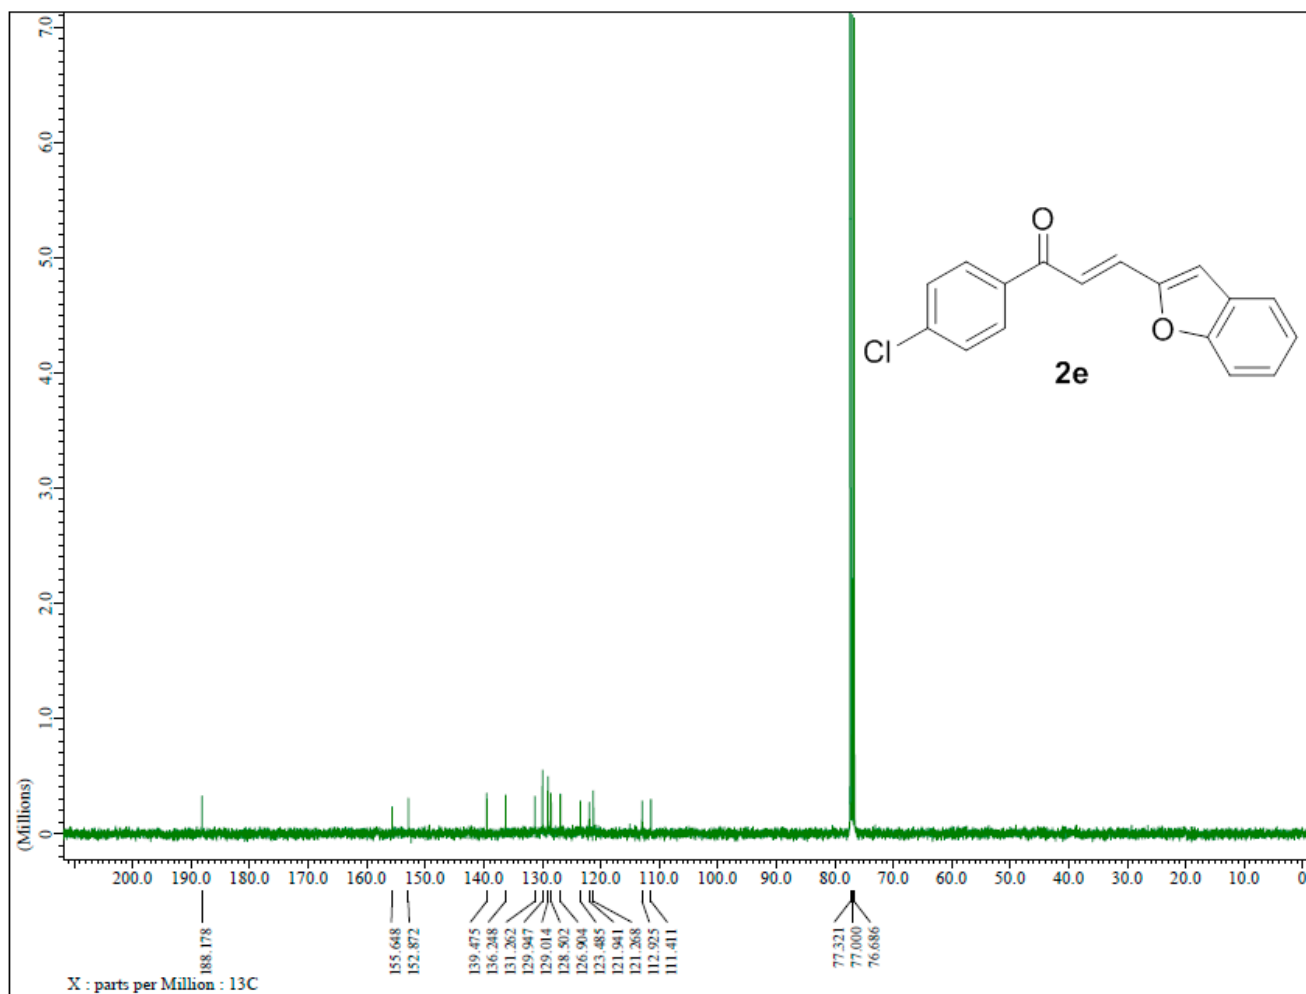

Figure S10. <sup>13</sup>C-NMR (100 MHz, CDCl<sub>3</sub>) of compound **2e**

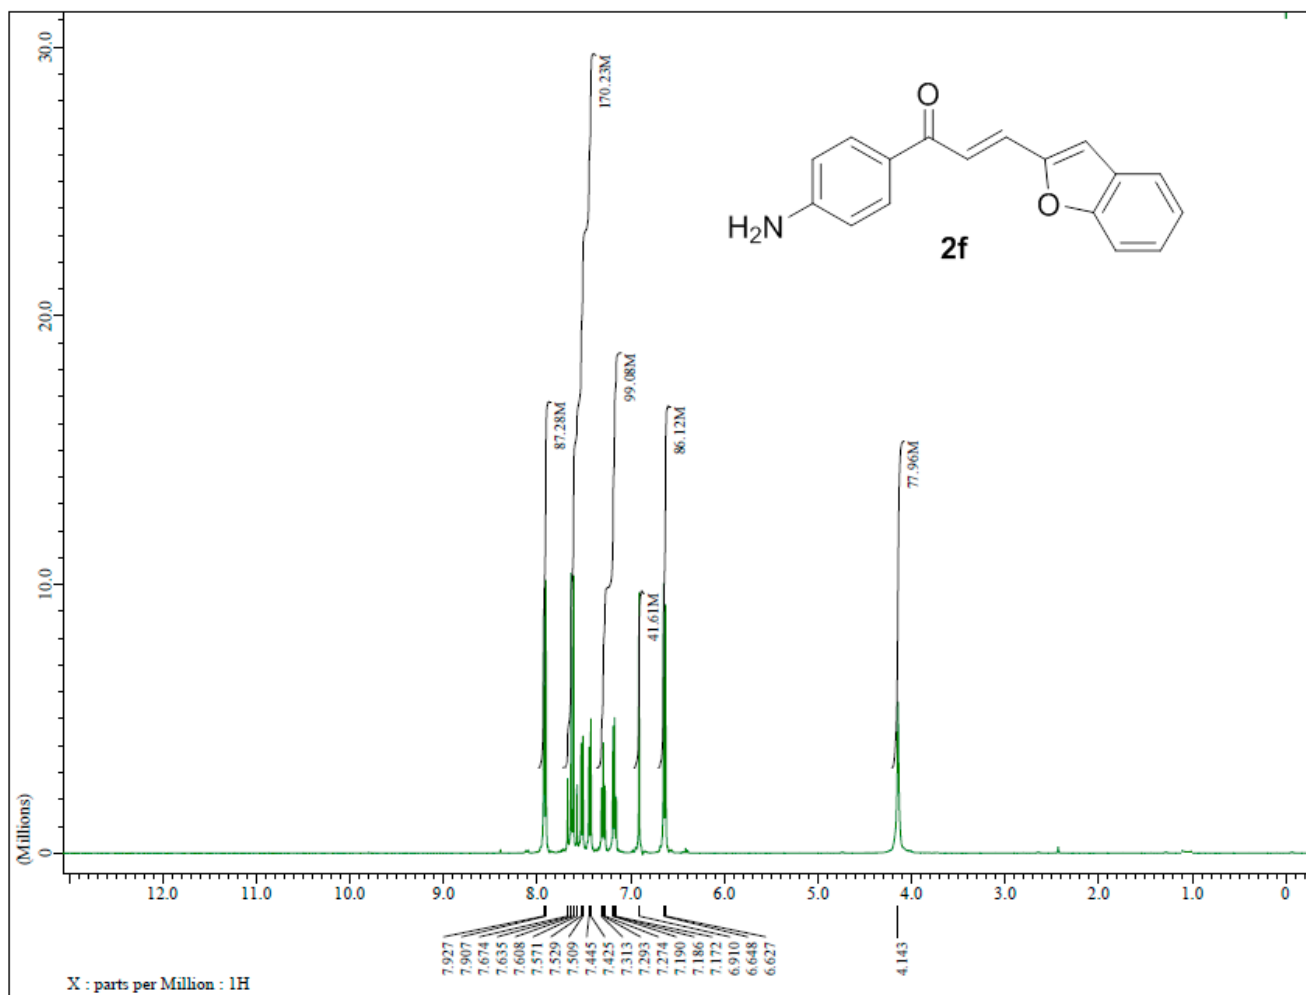

Figure S11. <sup>1</sup>H-NMR (400 MHz, CDCl<sub>3</sub>) of compound 2f

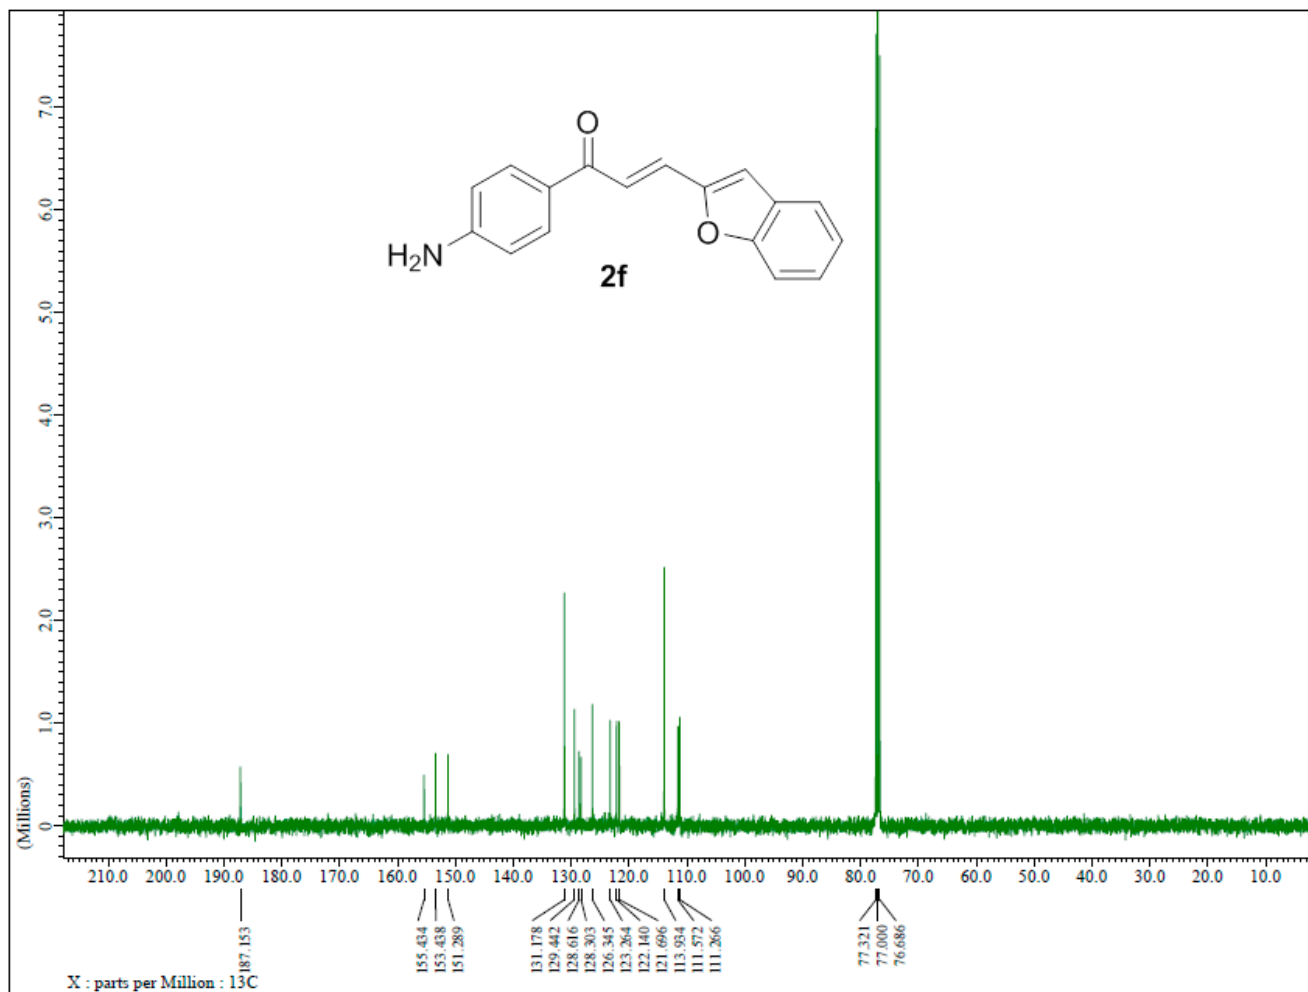

**Figure S12.** <sup>13</sup>C-NMR (100 MHz, CDCl<sub>3</sub>) of compound **2f**

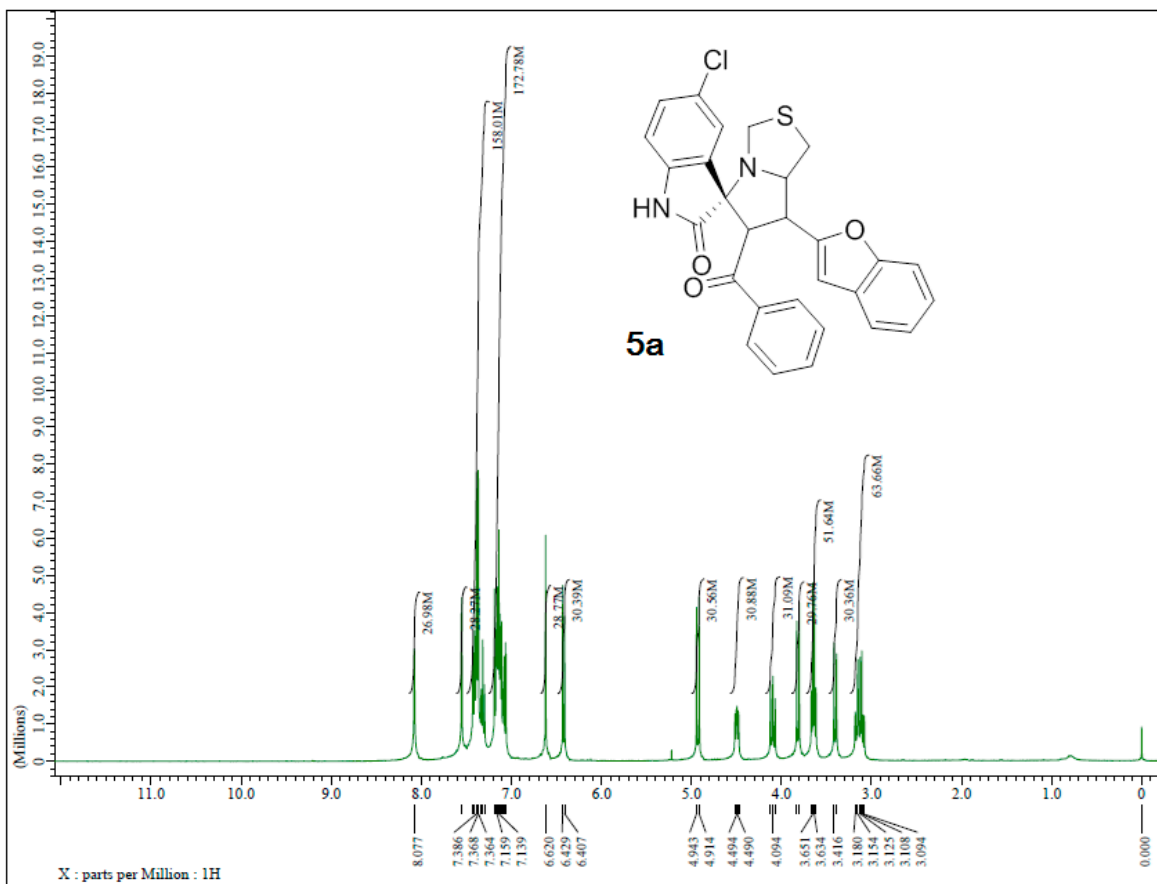

Figure S13. <sup>1</sup>H-NMR (400 MHz, CDCl<sub>3</sub>) of compound **5a**

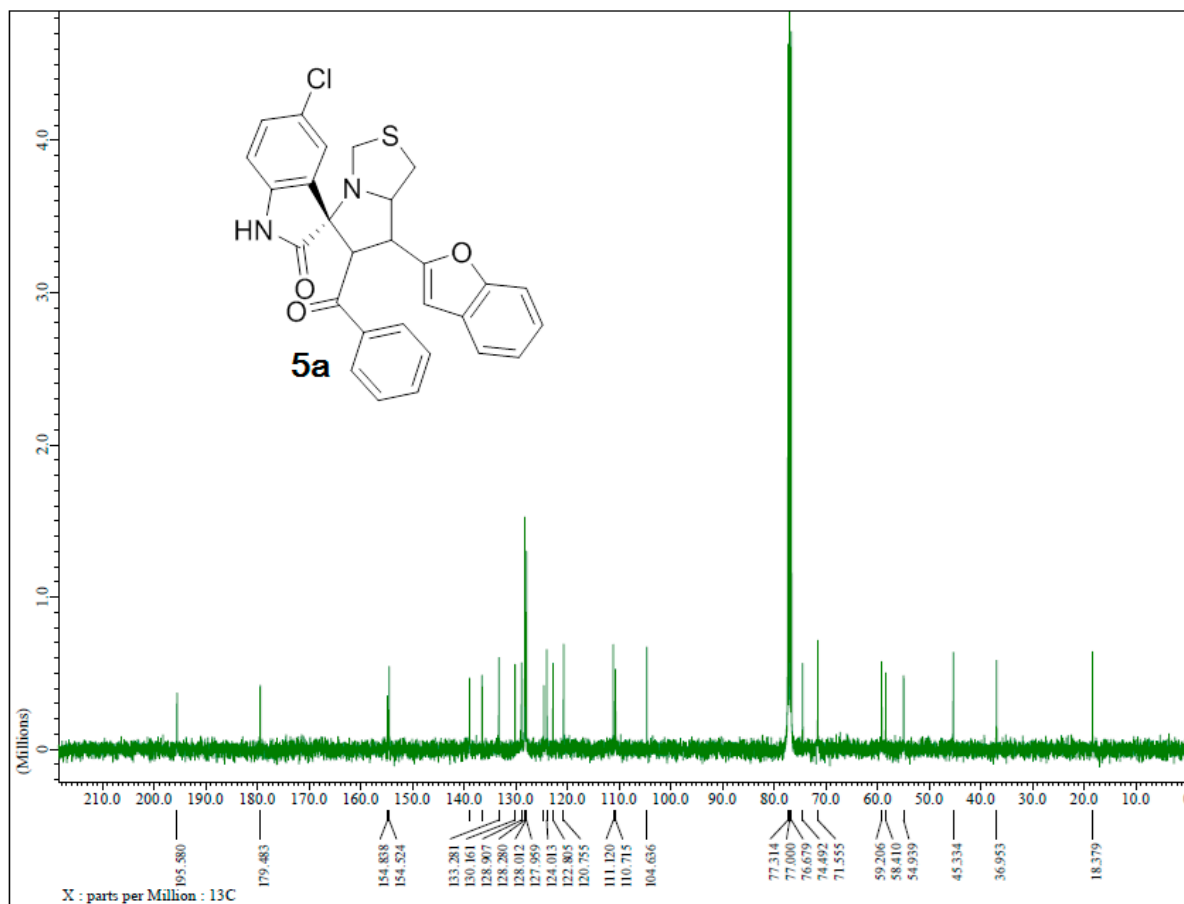

Figure S14.  $^{13}\text{C}$ -NMR (100 MHz,  $\text{CDCl}_3$ ) of compound 5a

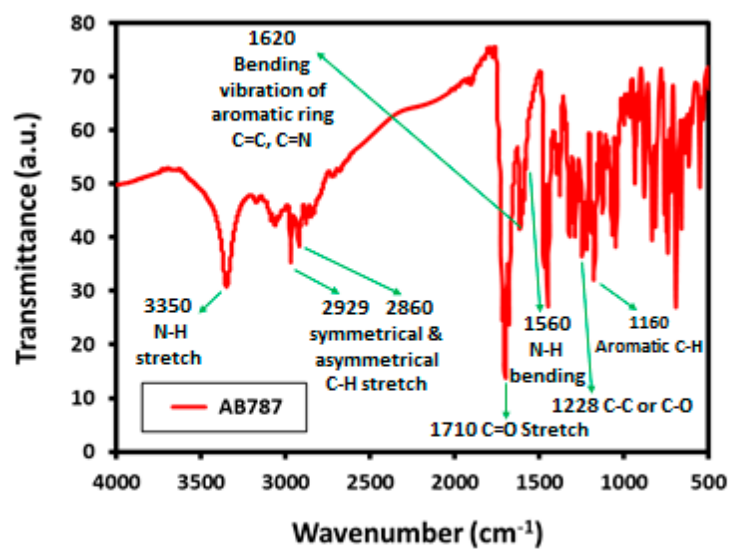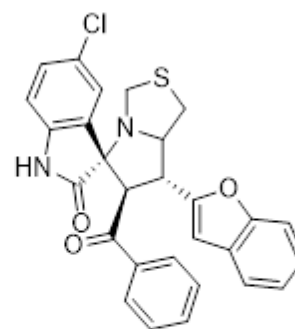

**5a**

Figure S15. IR (KBr, cm<sup>-1</sup>) of compound 5a



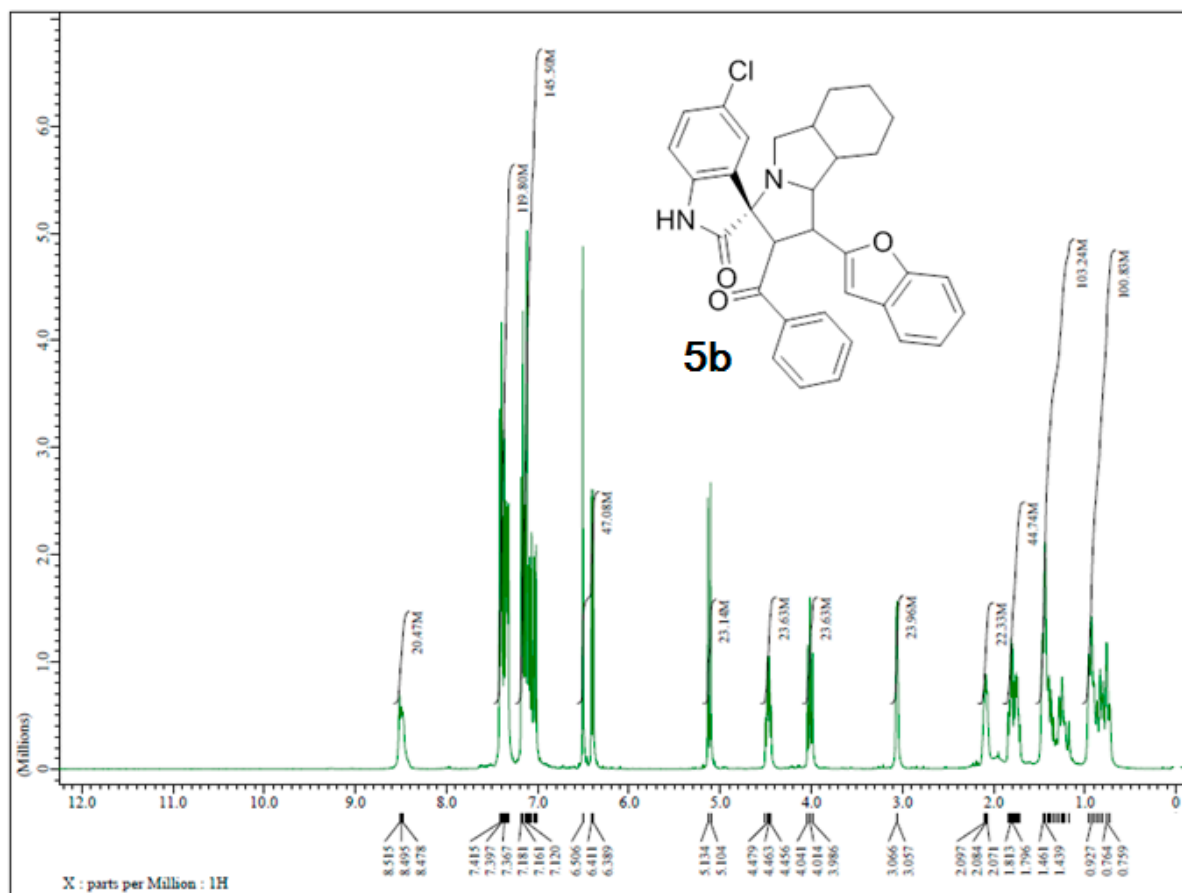

Figure S16.  $^1\text{H-NMR}$  (400 MHz,  $\text{CDCl}_3$ ) of compound **5b**

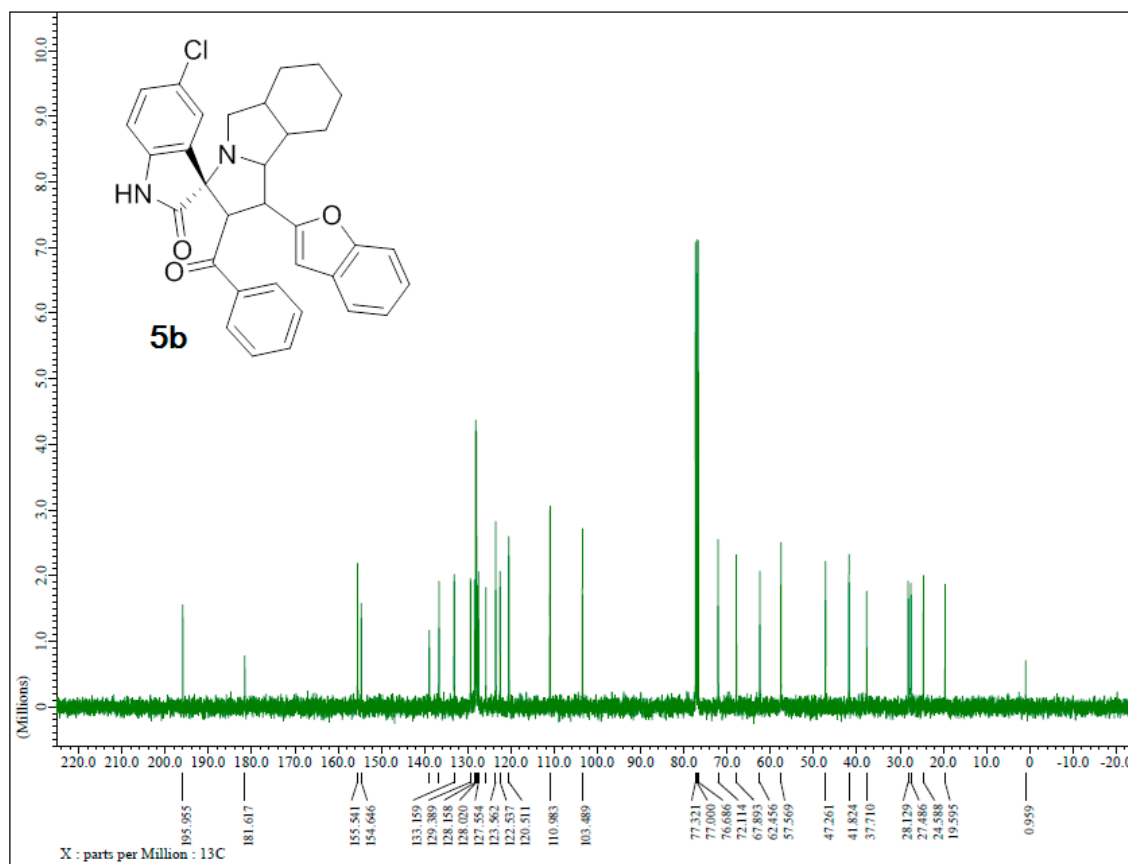

Figure S17.  $^{13}\text{C}$ -NMR (100 MHz,  $\text{CDCl}_3$ ) of compound **5b**

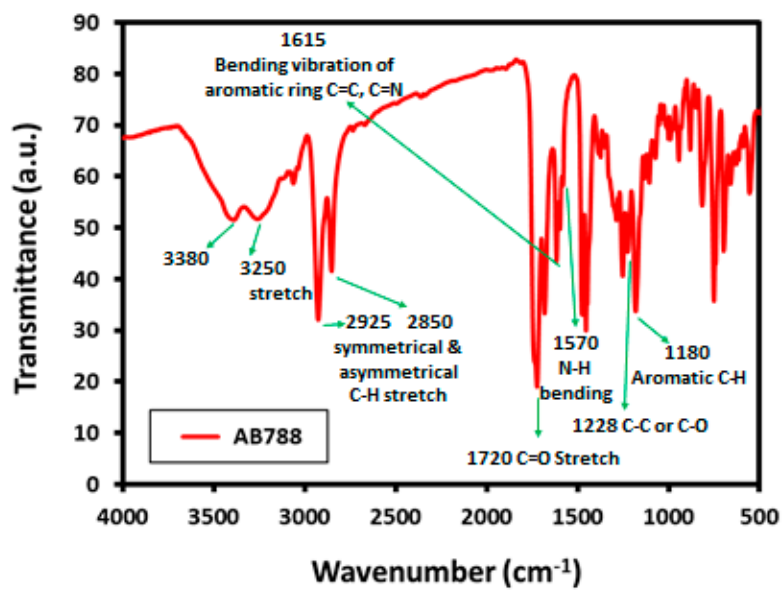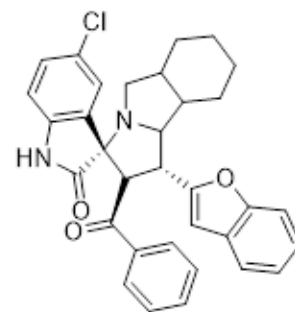

**5b**

Figure S18. IR (KBr, cm<sup>-1</sup>) of compound 5b

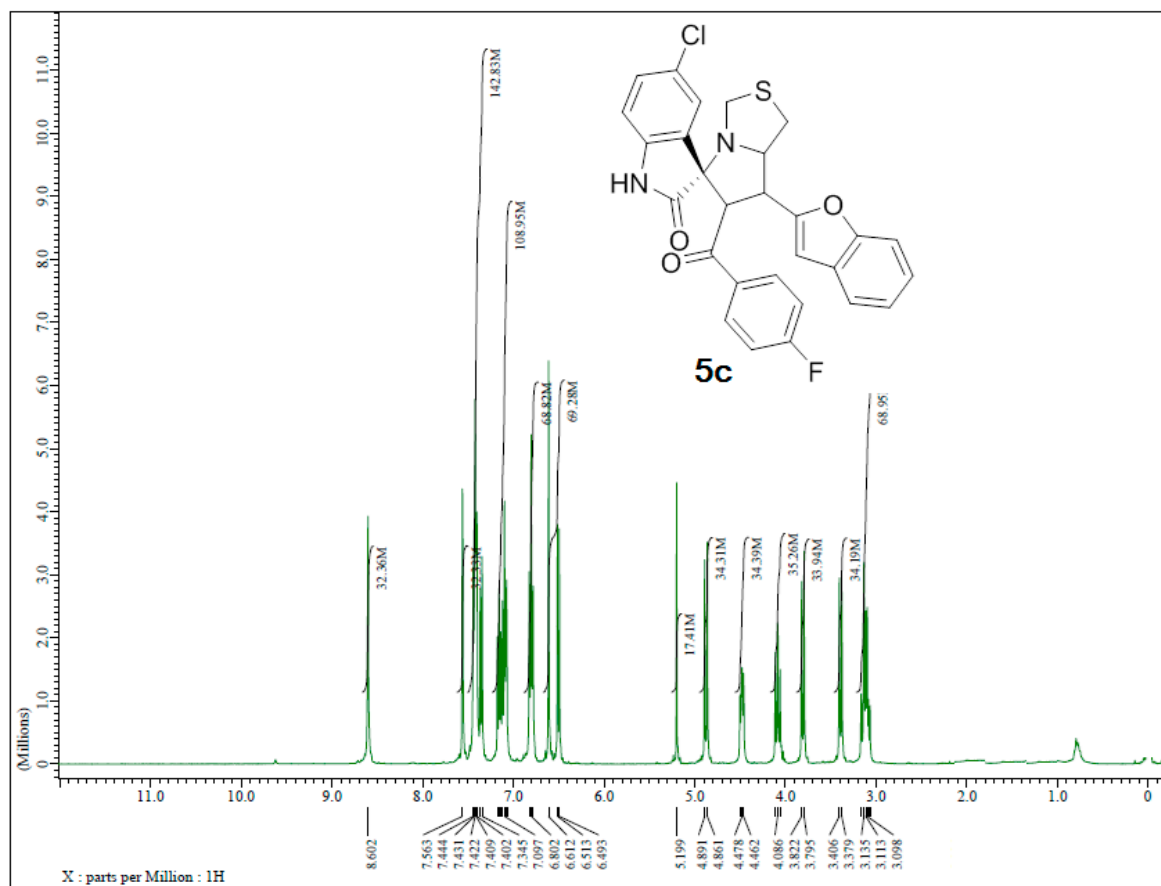

Figure S19.  $^1\text{H-NMR}$  (400 MHz,  $\text{CDCl}_3$ ) of compound **5c**

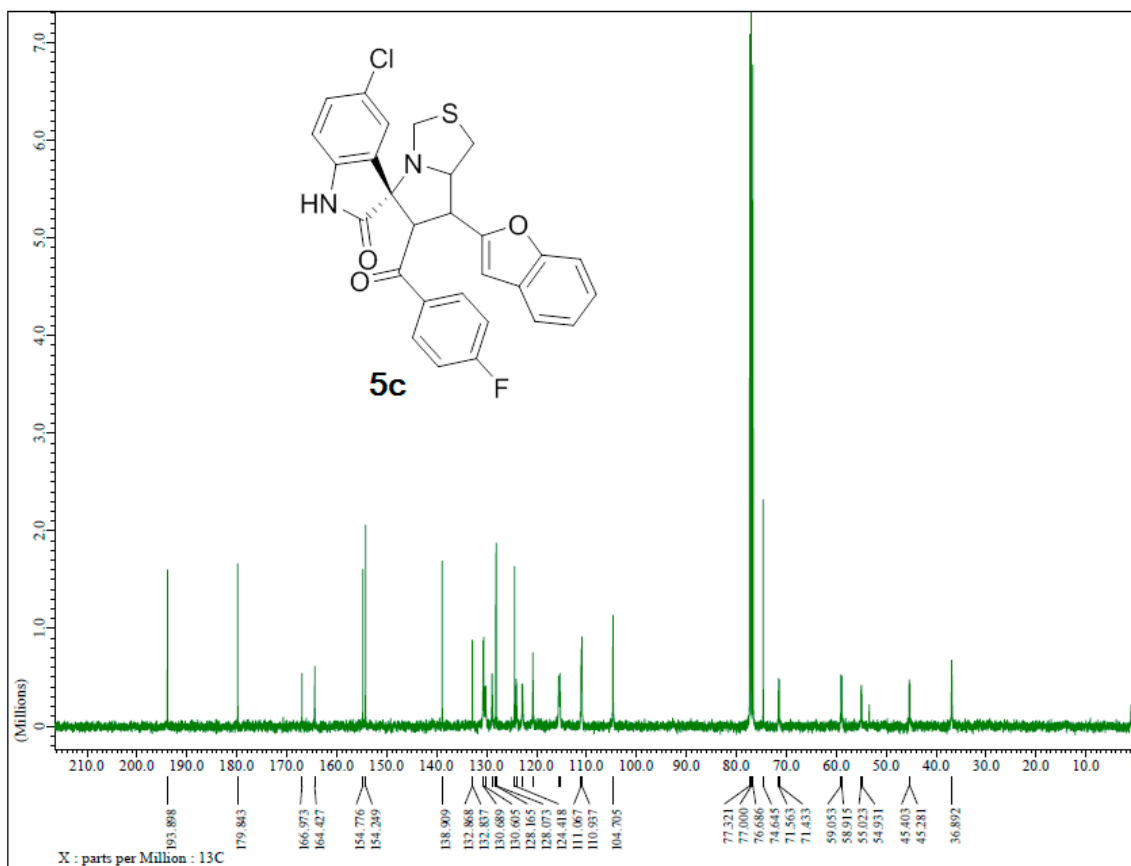

Figure S20.  $^{13}\text{C}$ -NMR (100 MHz,  $\text{CDCl}_3$ ) of compound 5c

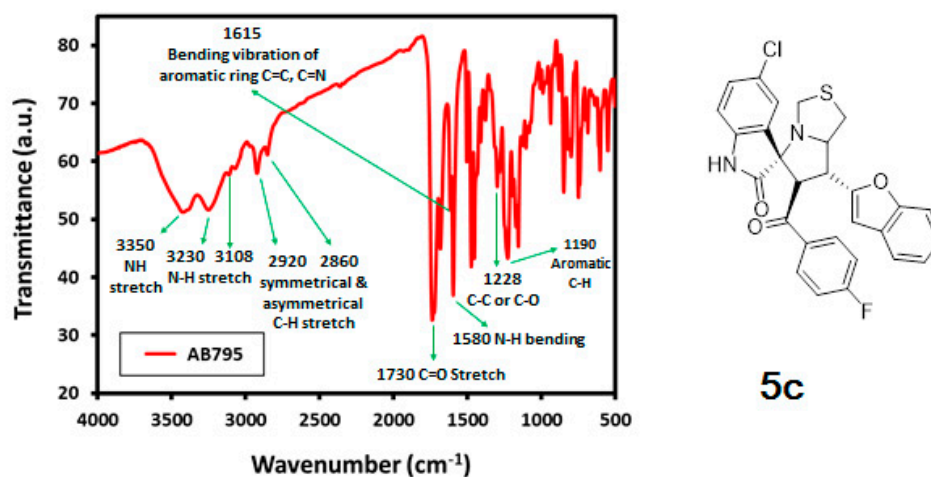

Figure S21. IR (KBr,  $\text{cm}^{-1}$ ) of compound 5c

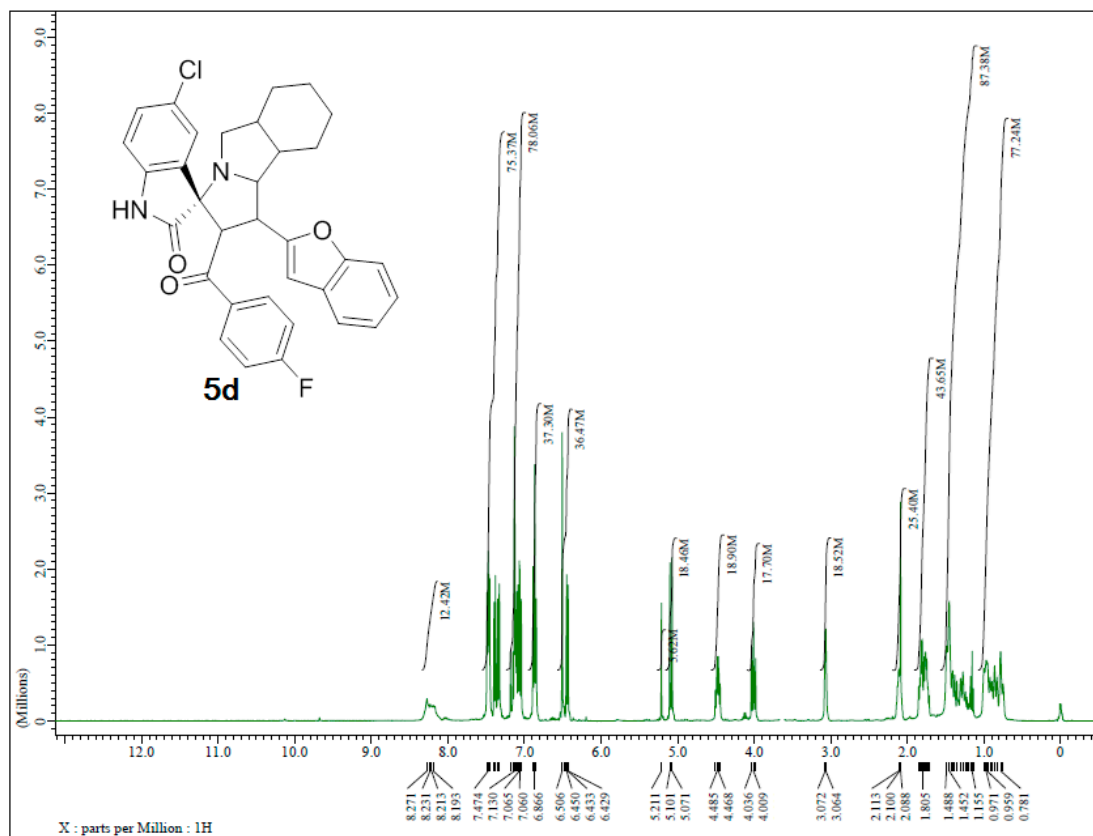

Figure S22.  $^1\text{H-NMR}$  (400 MHz,  $\text{CDCl}_3$ ) of compound **5d**

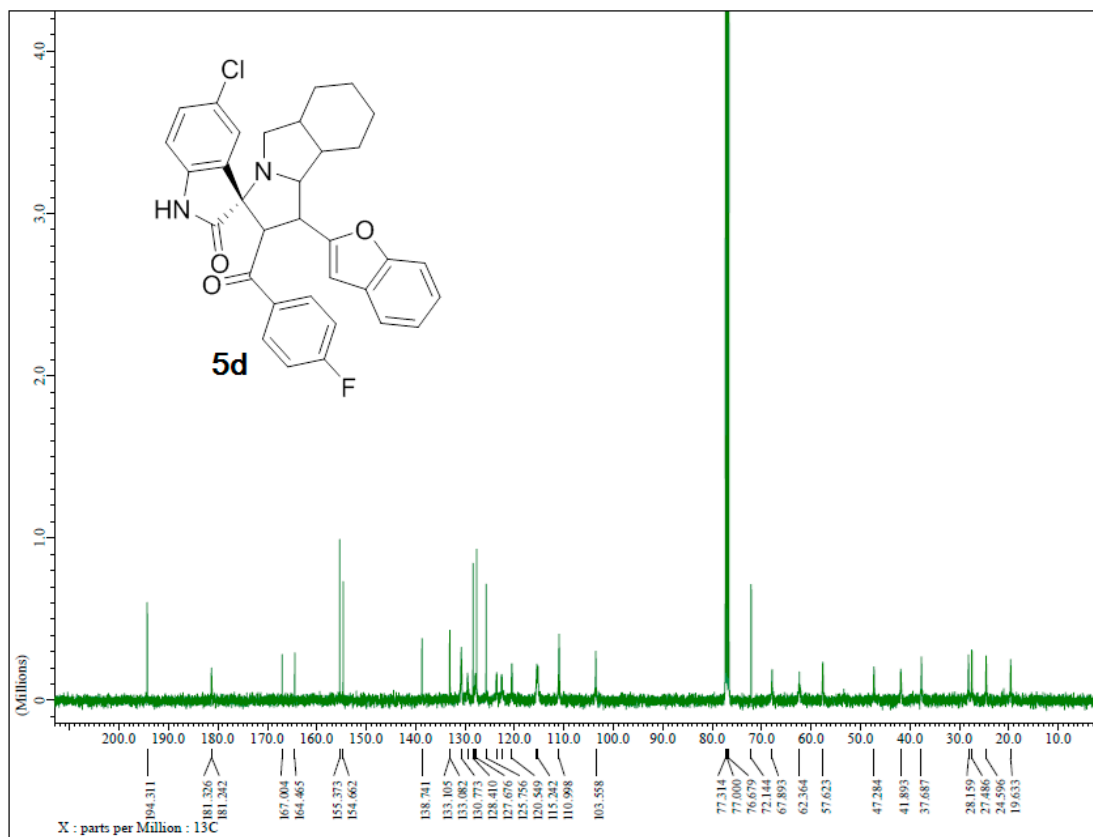

Figure S23.  $^{13}\text{C}$ -NMR (100 MHz,  $\text{CDCl}_3$ ) of compound 5d

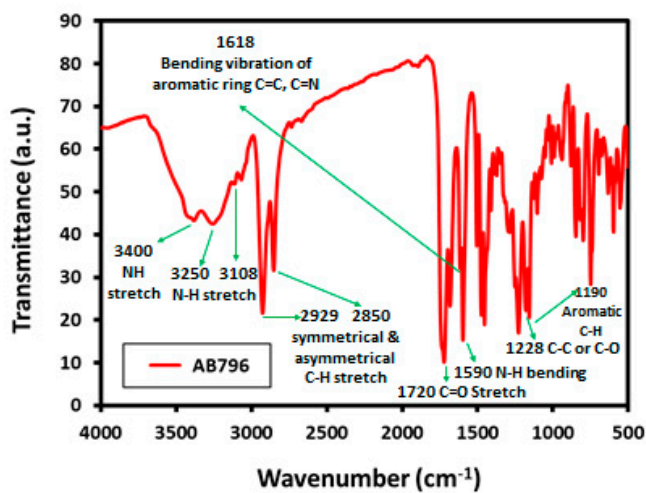

Figure S24. IR (KBr,  $\text{cm}^{-1}$ ) of compound 5d

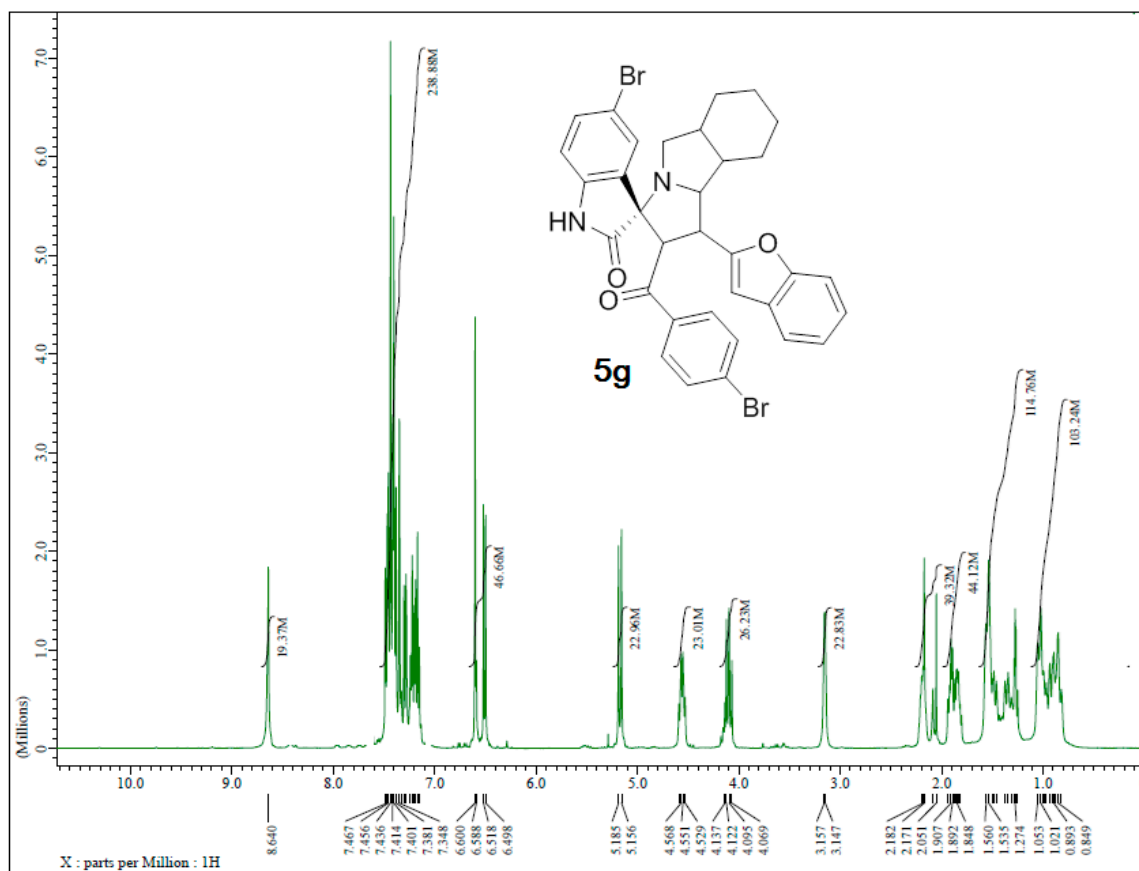

Figure S25.  $^1\text{H-NMR}$  (400 MHz,  $\text{CDCl}_3$ ) of compound **5g**



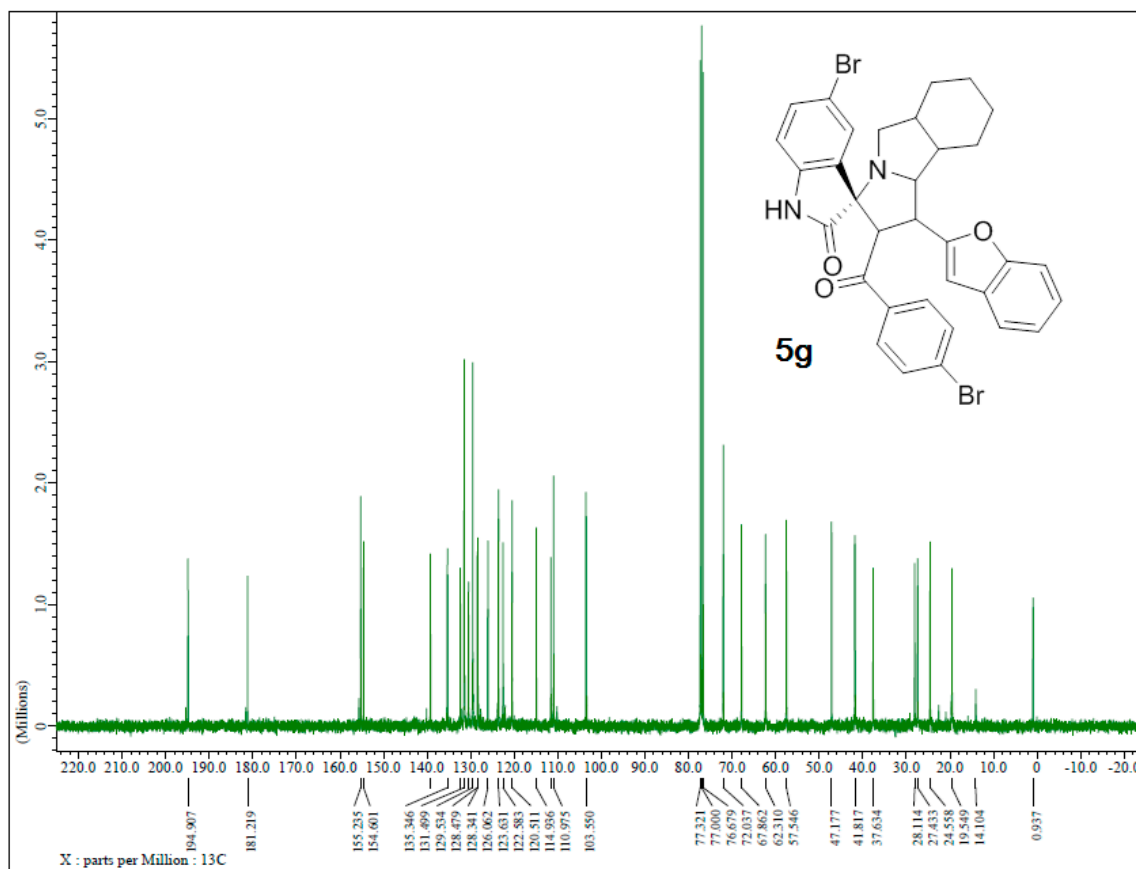

Figure S26.  $^{13}\text{C}$ -NMR (100 MHz,  $\text{CDCl}_3$ ) of compound 5g

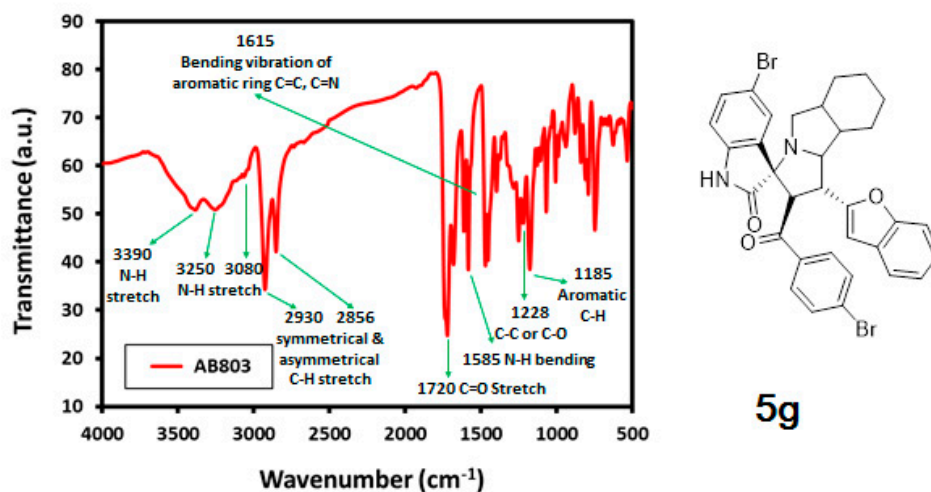

Figure S27. IR (KBr,  $\text{cm}^{-1}$ ) of compound 5g

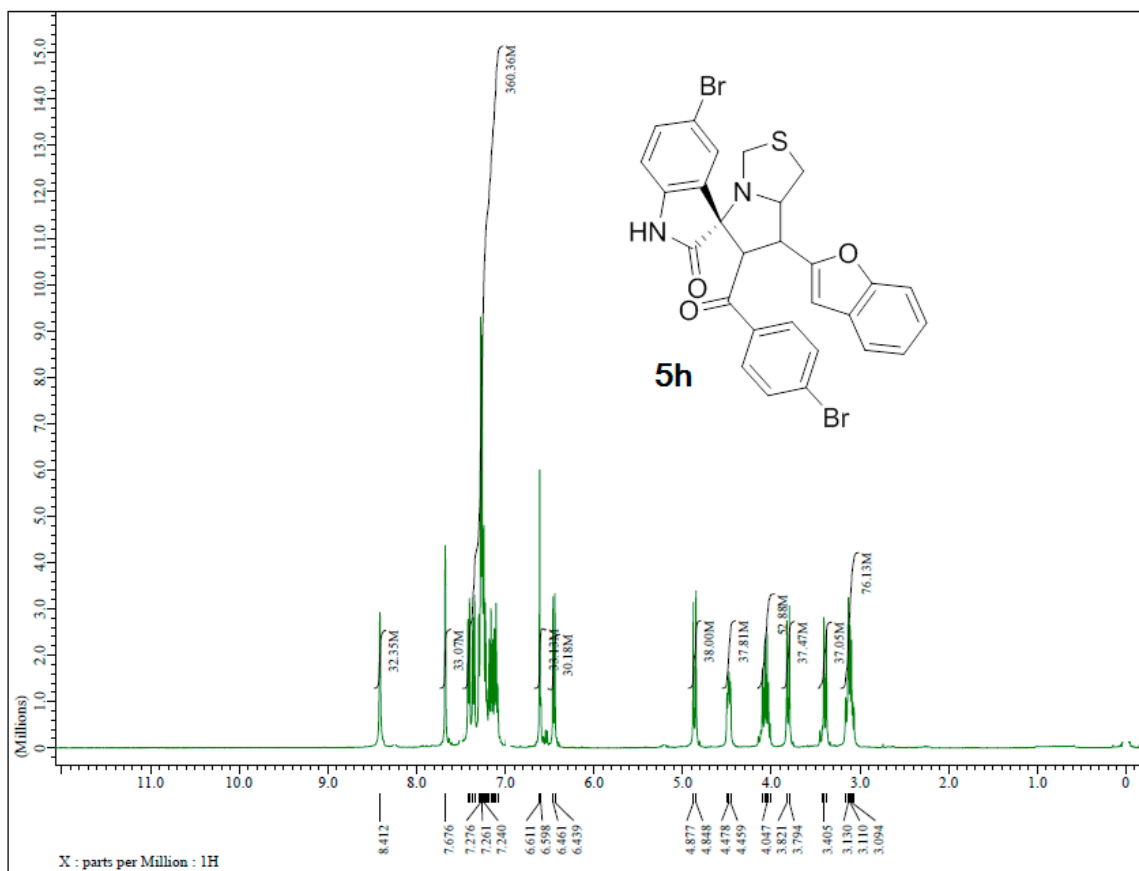

Figure S28.  $^1\text{H-NMR}$  (400 MHz,  $\text{CDCl}_3$ ) of compound **5h**

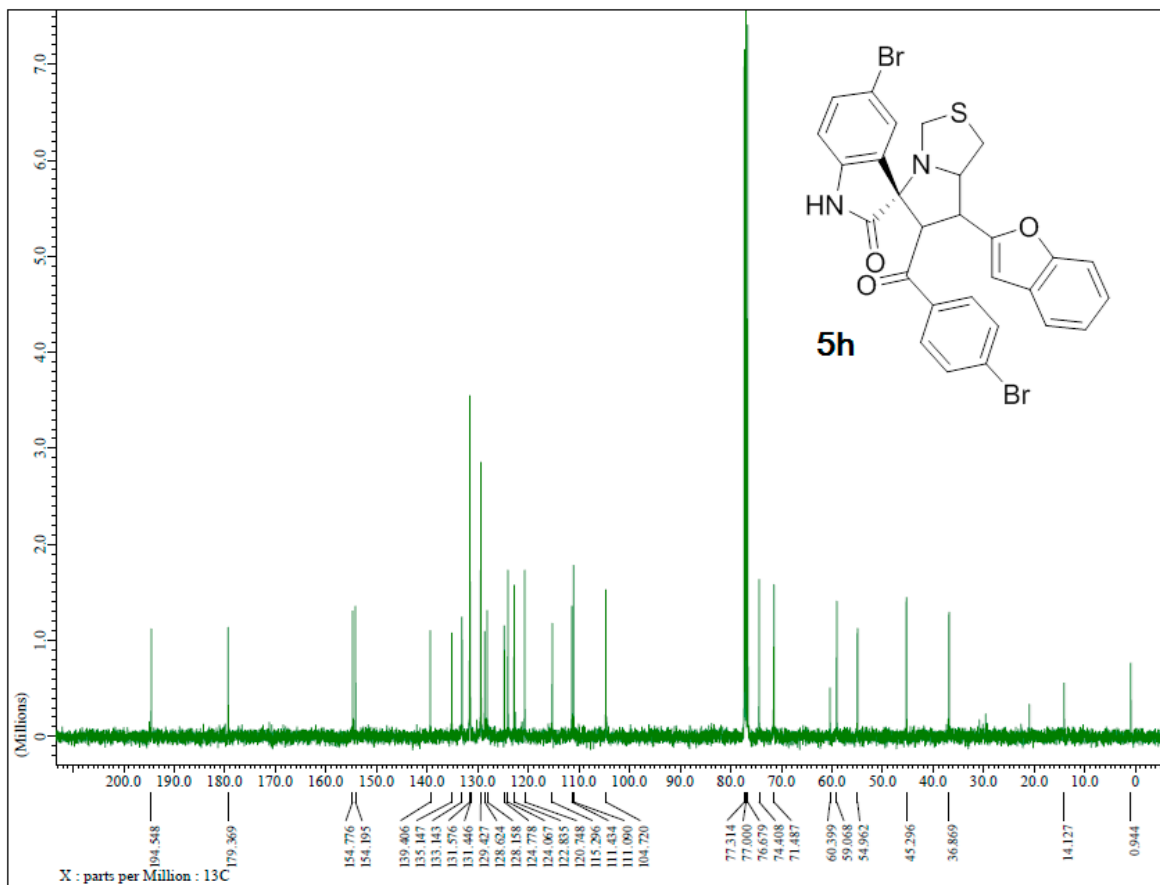

Figure S29.  $^{13}\text{C}$ -NMR (100 MHz,  $\text{CDCl}_3$ ) of compound 5h

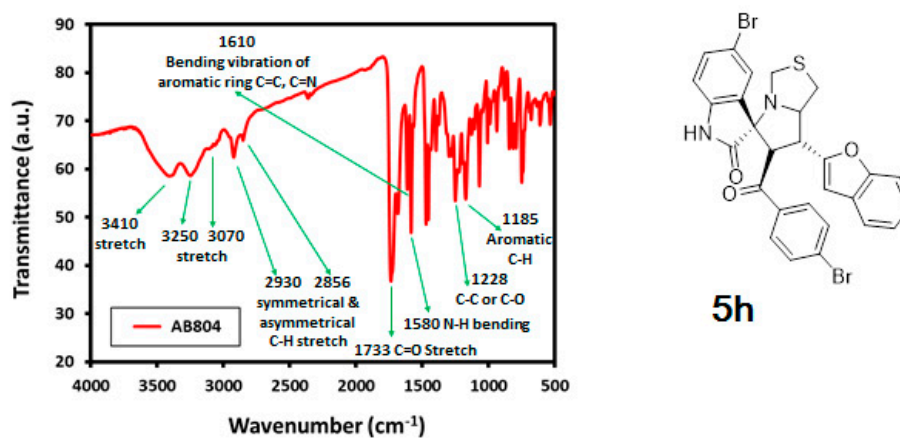

Figure S30. IR (KBr,  $\text{cm}^{-1}$ ) of compound 5h

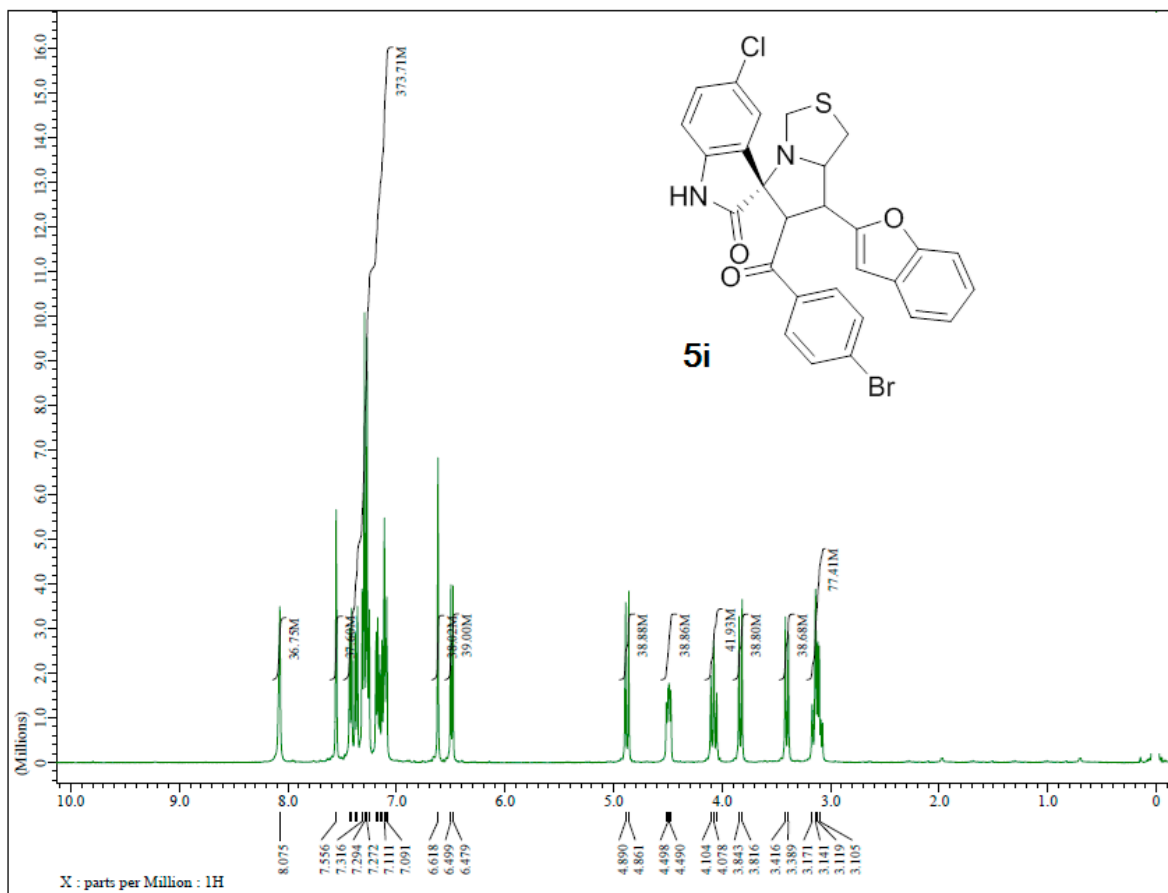

Figure S31. <sup>1</sup>H-NMR (400 MHz, CDCl<sub>3</sub>) of compound **5i**

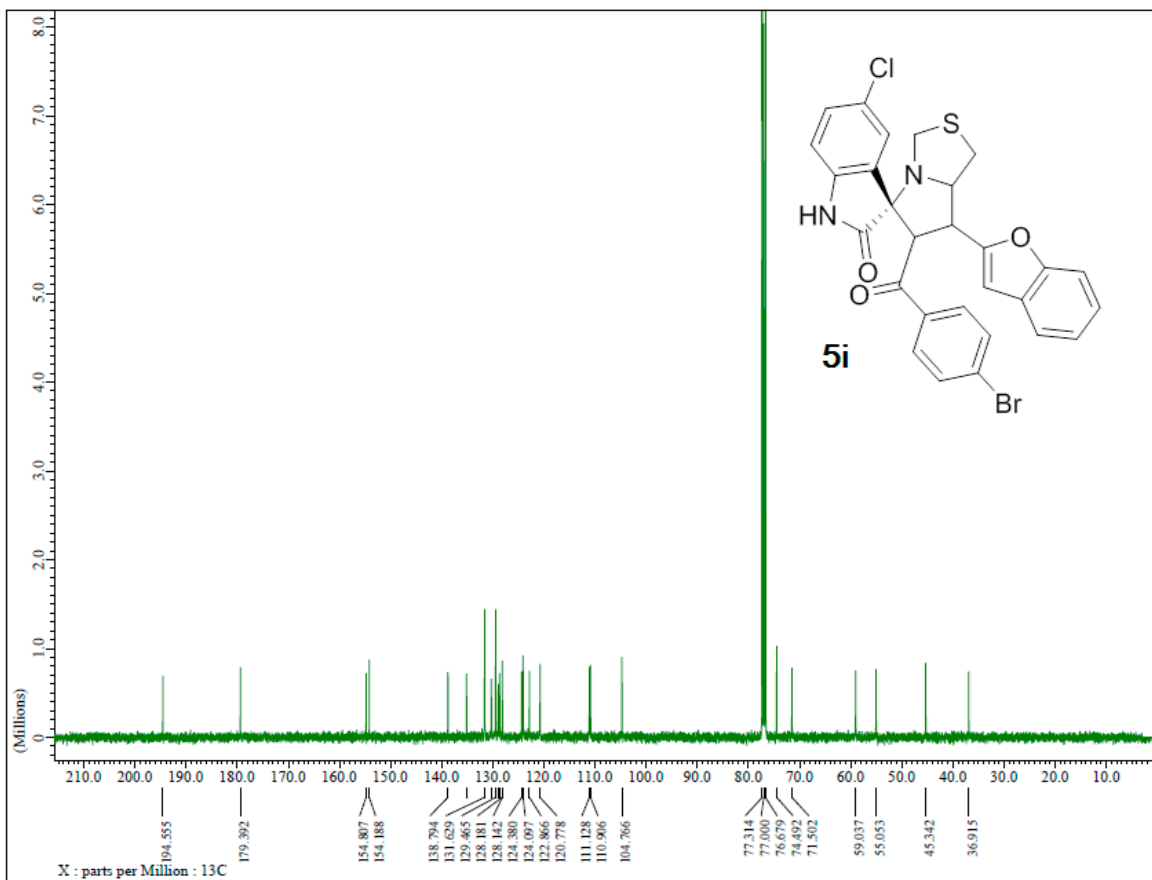

Figure S32. <sup>13</sup>C-NMR (100 MHz, CDCl<sub>3</sub>) of compound **5i**

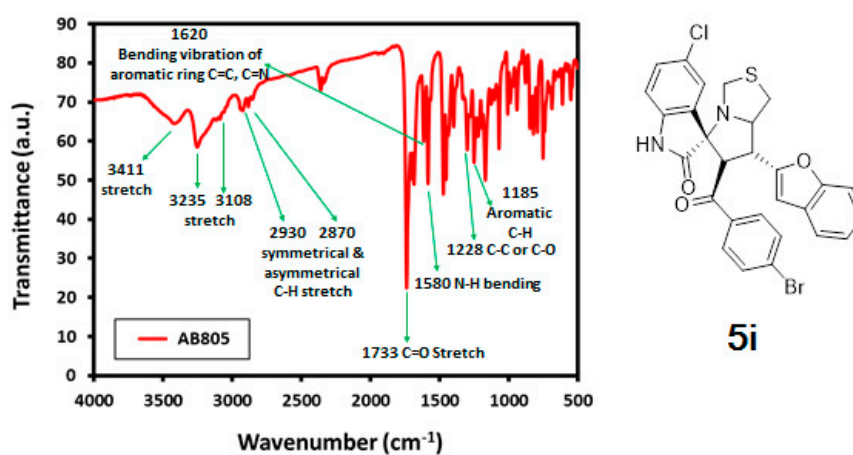

Figure S33. IR (KBr, cm<sup>-1</sup>) of compound **5i**

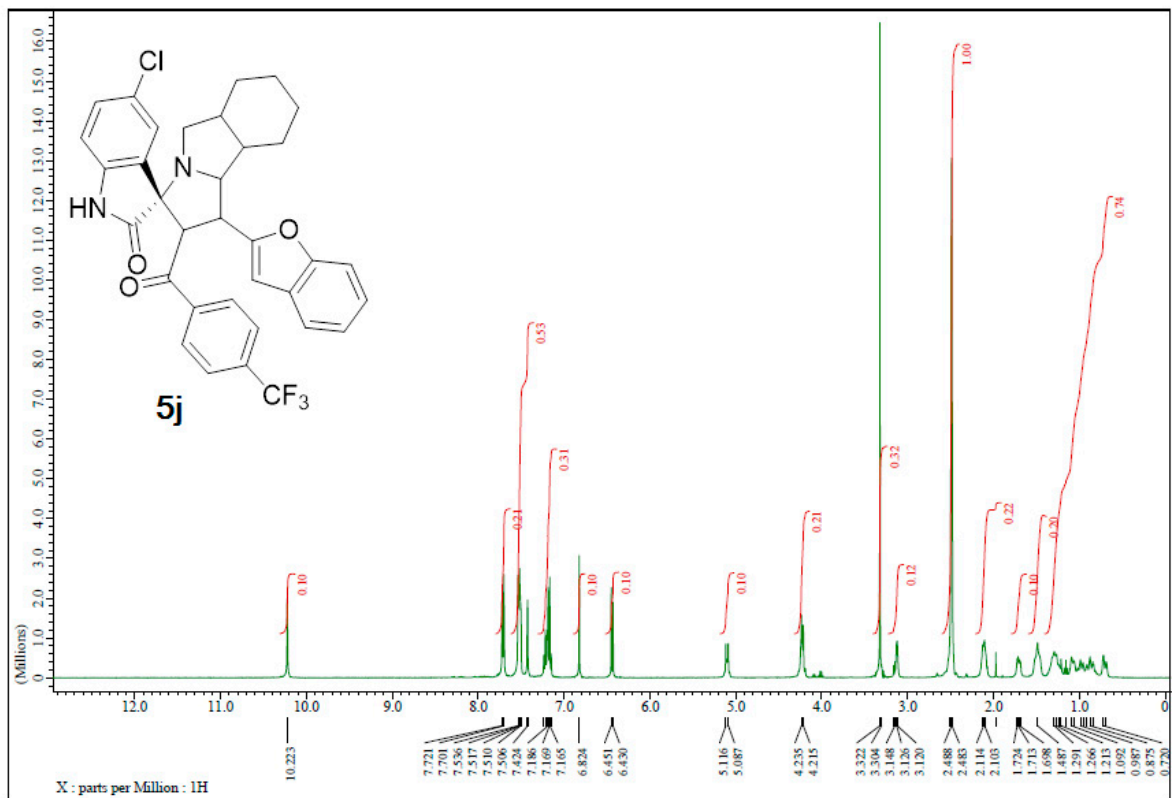

Figure S34.  $^1\text{H-NMR}$  (400 MHz,  $\text{CDCl}_3$ ) of compound **5j**

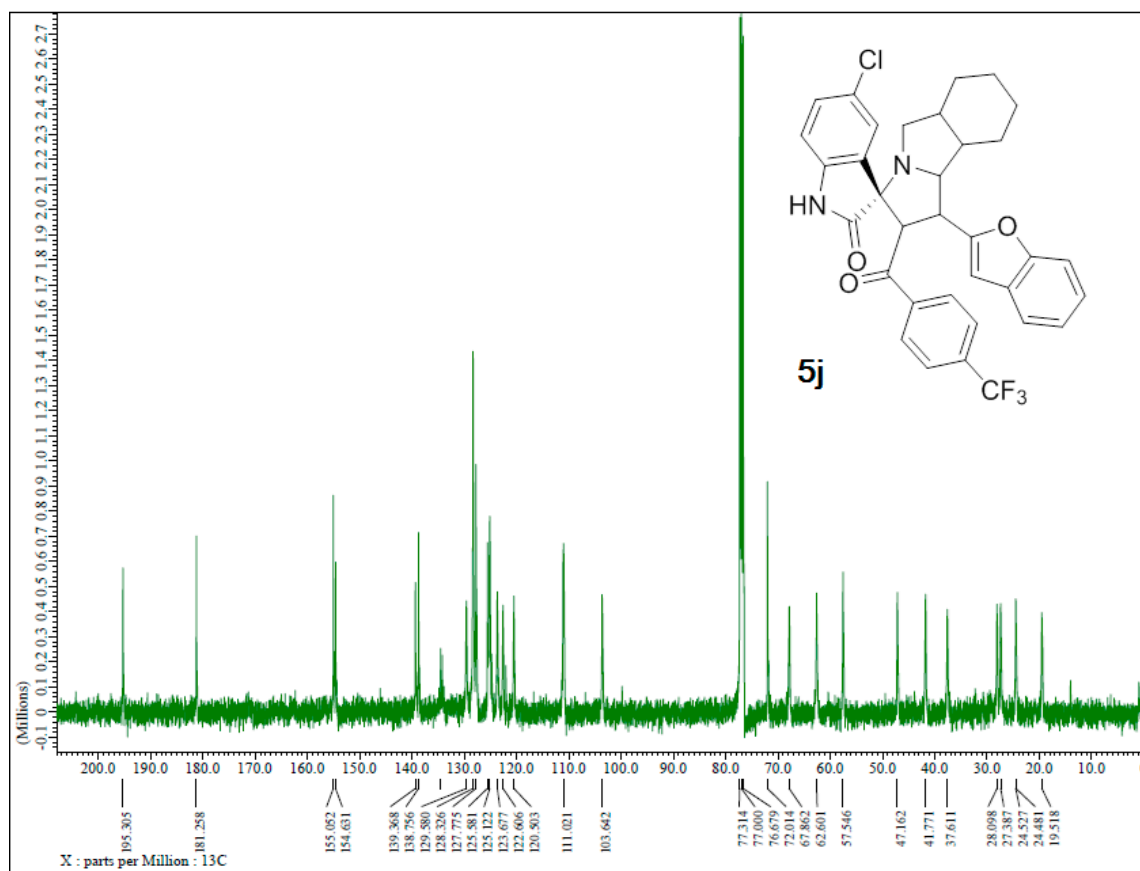

Figure S35. <sup>13</sup>C-NMR (100 MHz, CDCl<sub>3</sub>) of compound **5j**

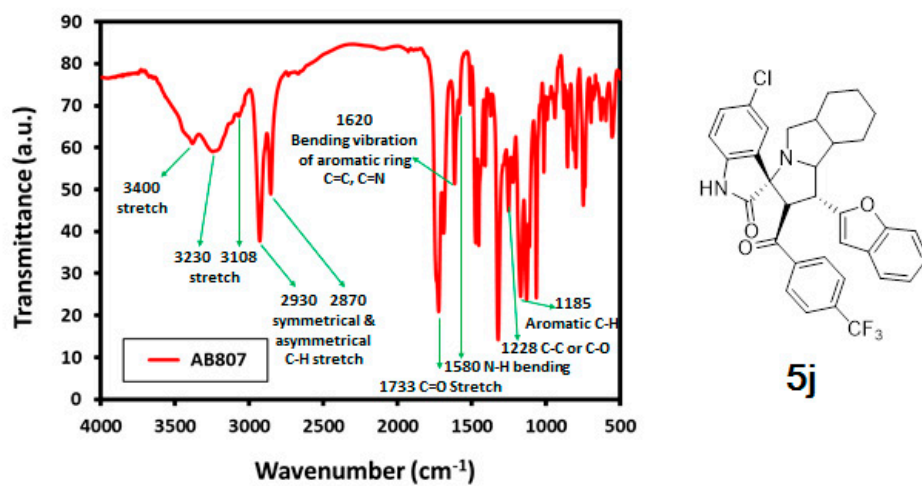

Figure S36. IR (KBr, cm<sup>-1</sup>) of compound **5j**

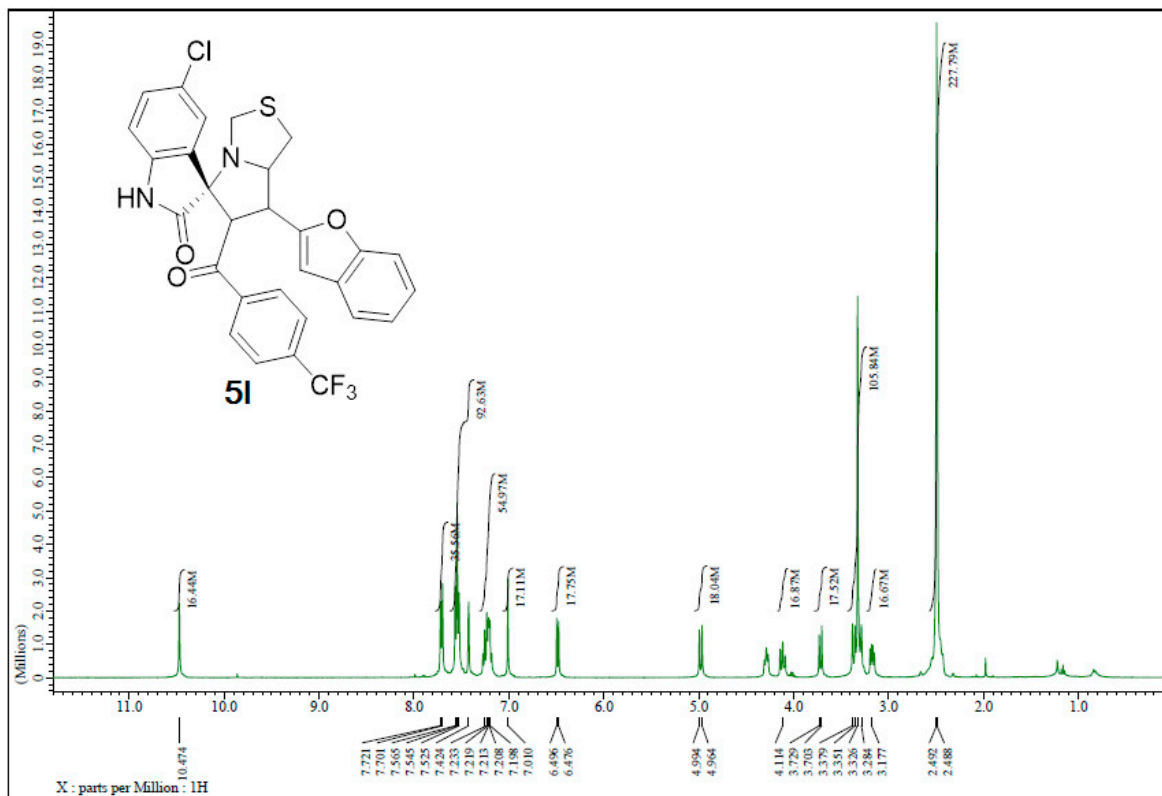

Figure S37.  $^1\text{H-NMR}$  (400 MHz,  $\text{CDCl}_3$ ) of compound **51**



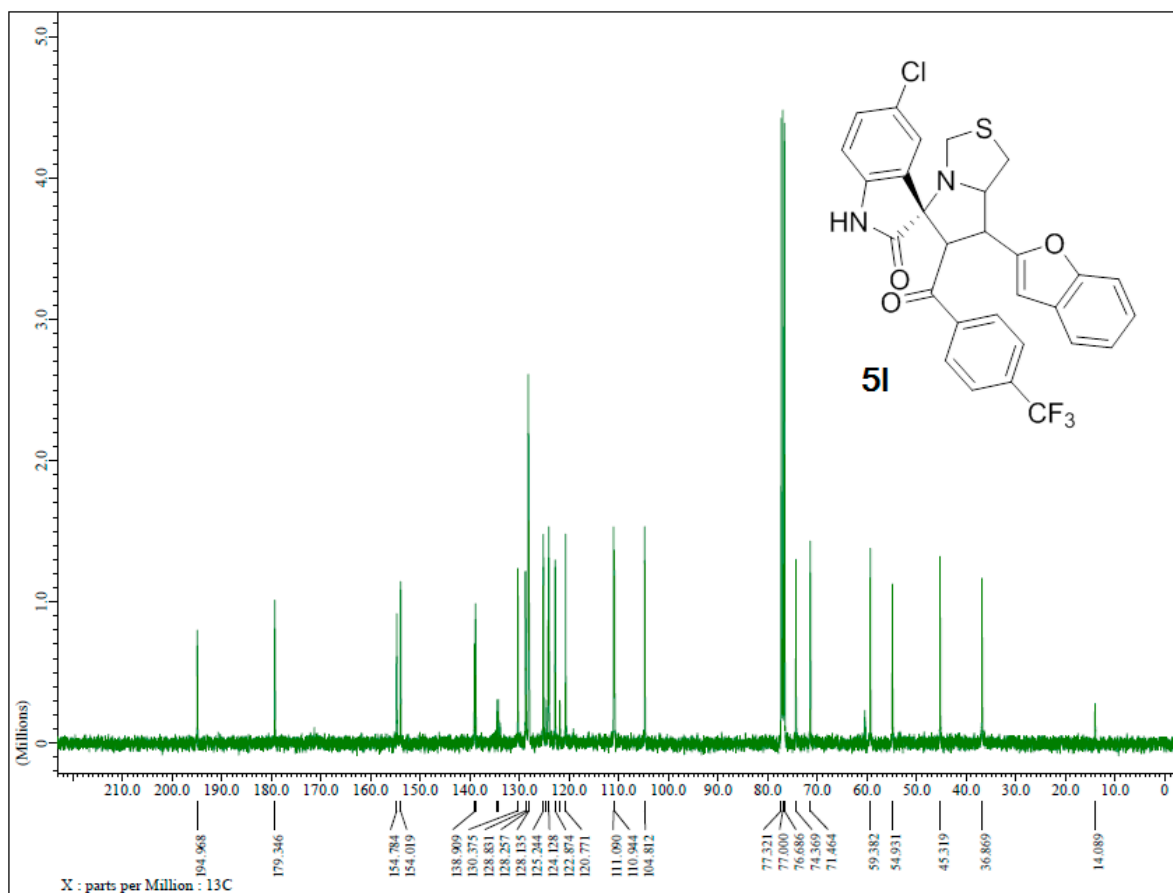

Figure S38.  $^{13}\text{C}$ -NMR (100 MHz,  $\text{CDCl}_3$ ) of compound **51**

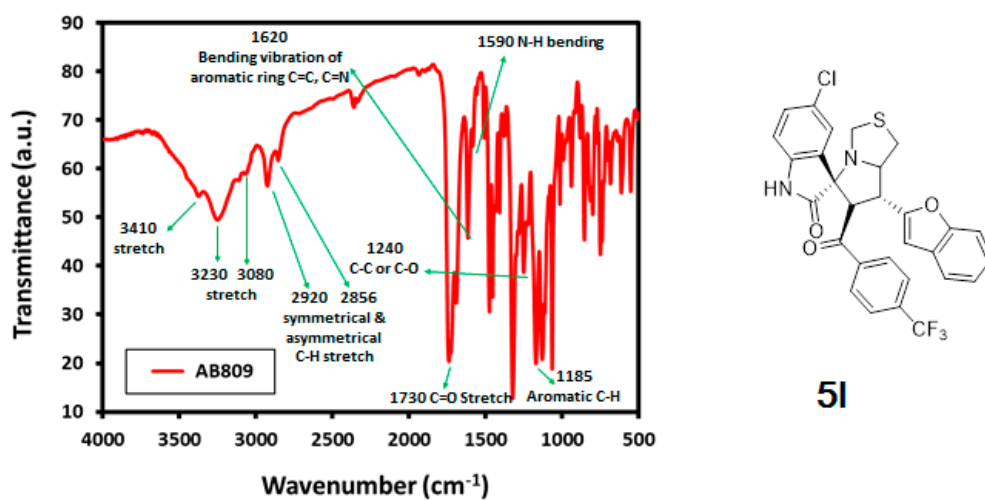

Figure S39. IR (KBr,  $\text{cm}^{-1}$ ) of compound **51**

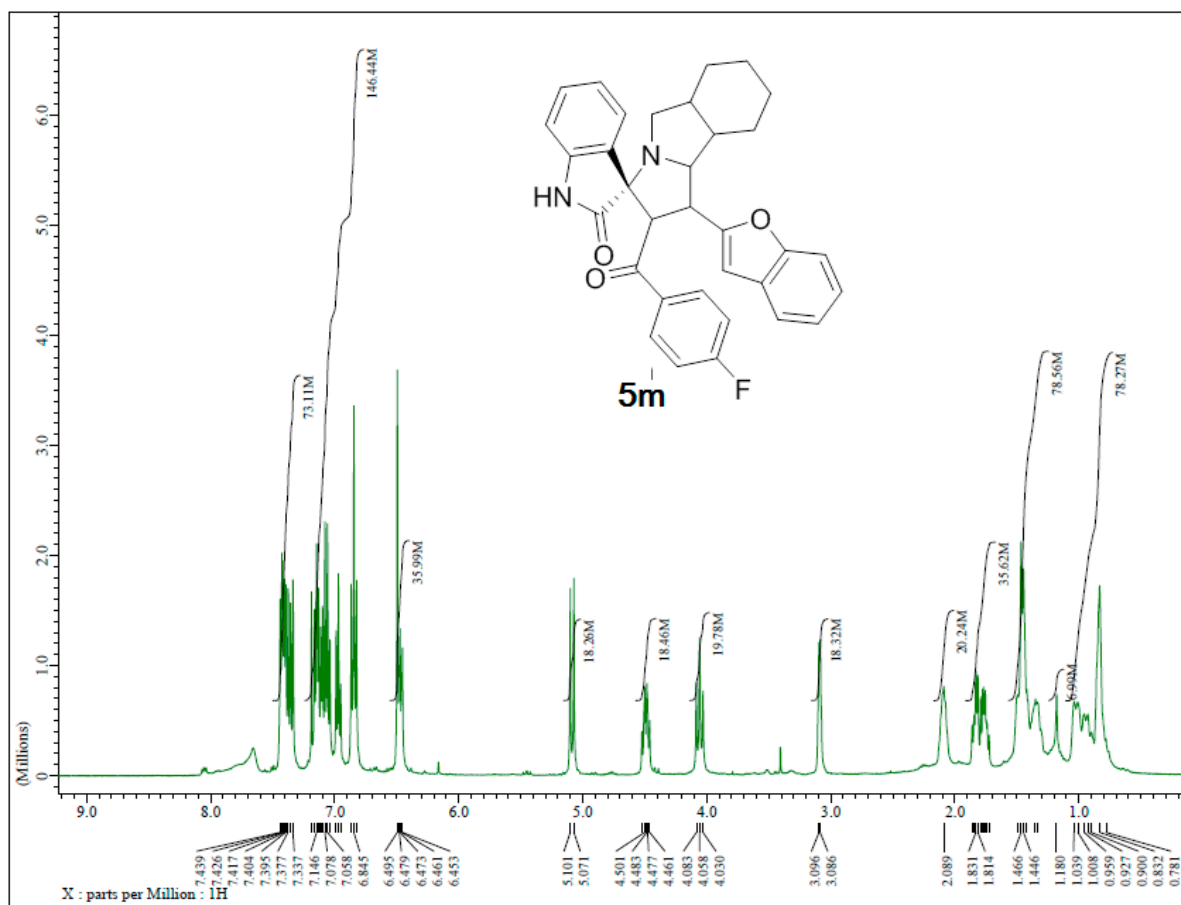

Figure S40.  $^1\text{H-NMR}$  (400 MHz,  $\text{CDCl}_3$ ) of compound **5m**

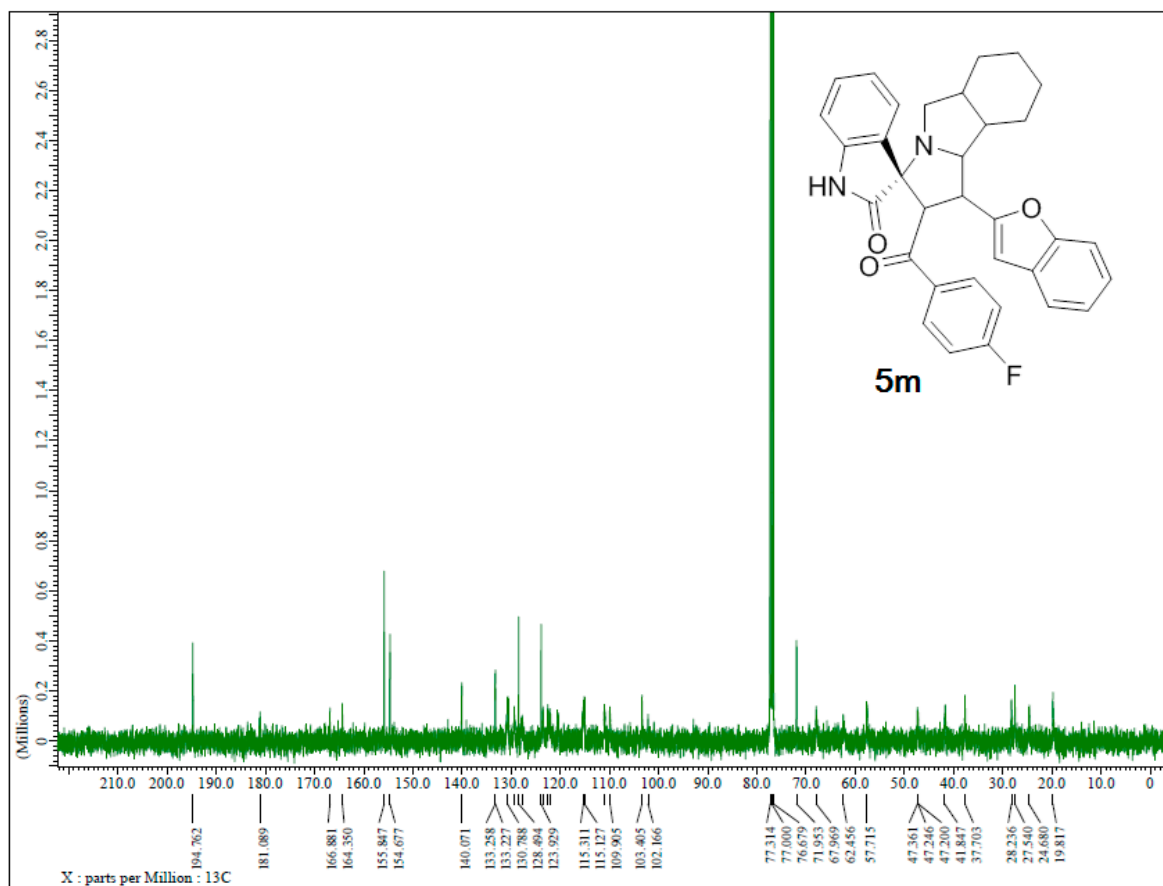

Figure S41. <sup>13</sup>C-NMR (100 MHz, CDCl<sub>3</sub>) of compound **5m**

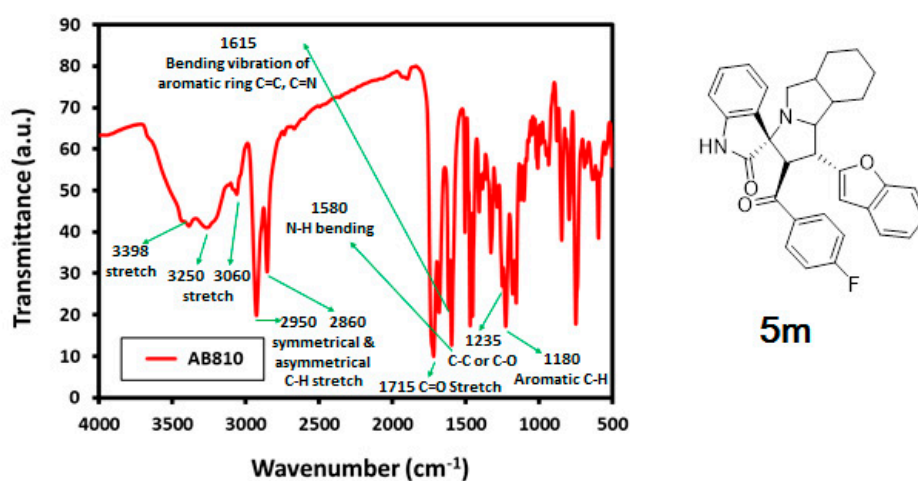

Figure S42. IR (KBr, cm<sup>-1</sup>) of compound **5m**

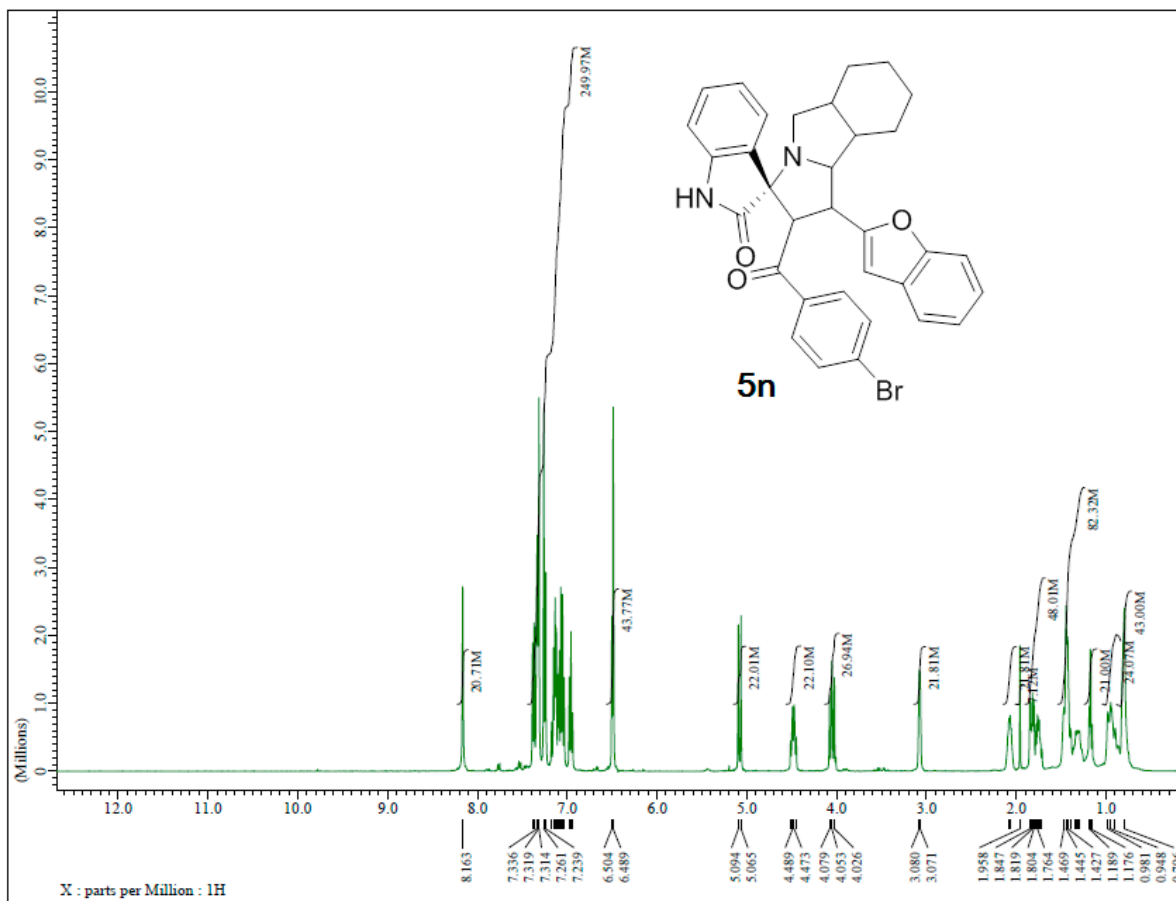

**Figure S43.**  $^1\text{H-NMR}$  (400 MHz,  $\text{CDCl}_3$ ) of compound **5n**

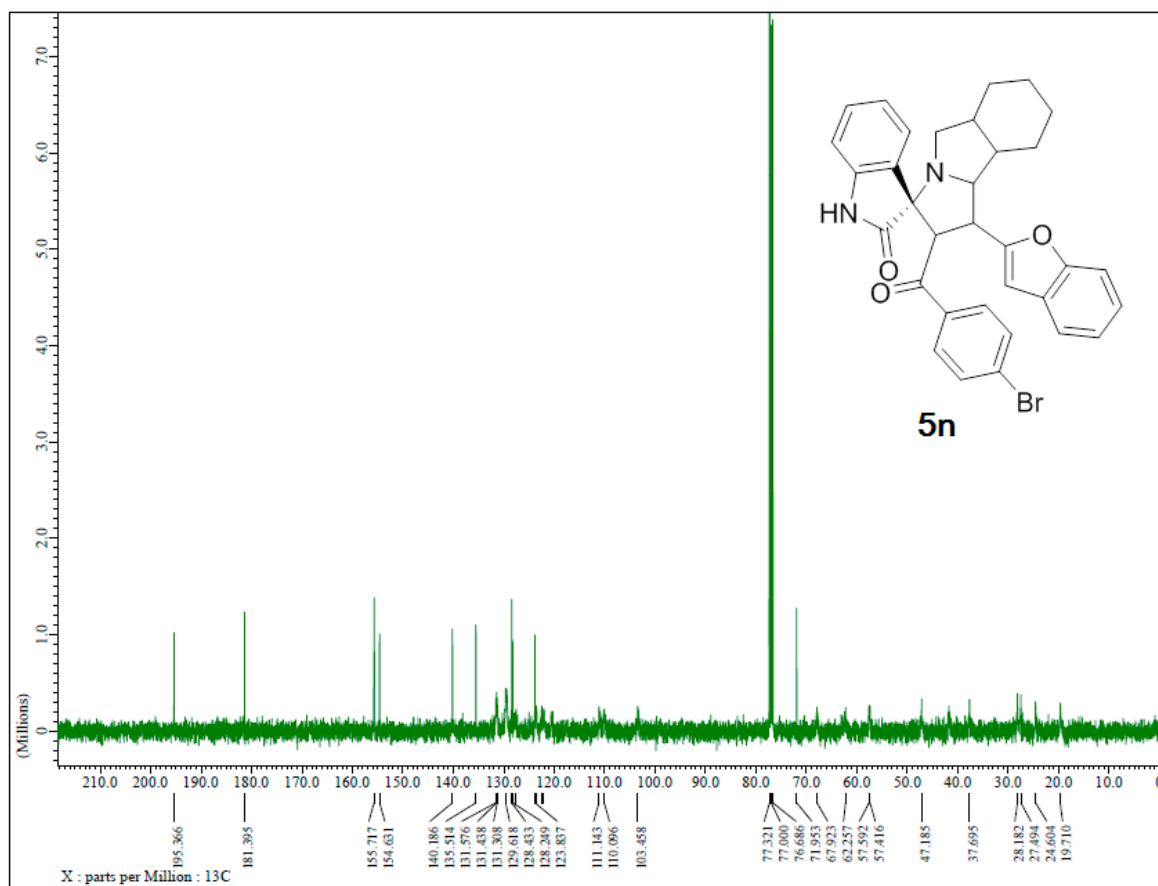

Figure S44.  $^{13}\text{C}$ -NMR (100 MHz,  $\text{CDCl}_3$ ) of compound **5n**

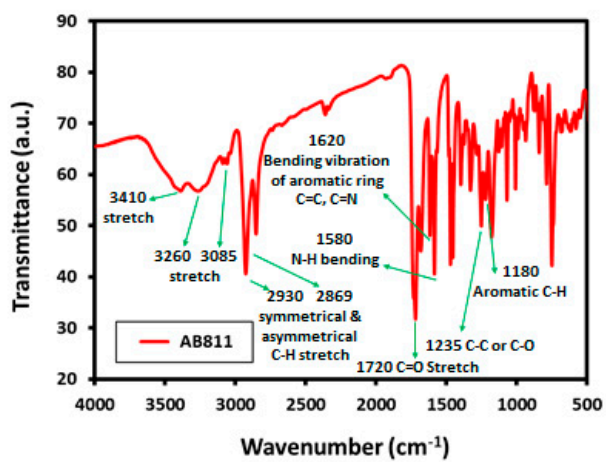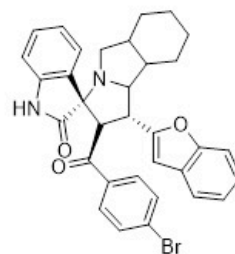

**5n**

Figure S45. IR (KBr, cm<sup>-1</sup>) of compound 5n

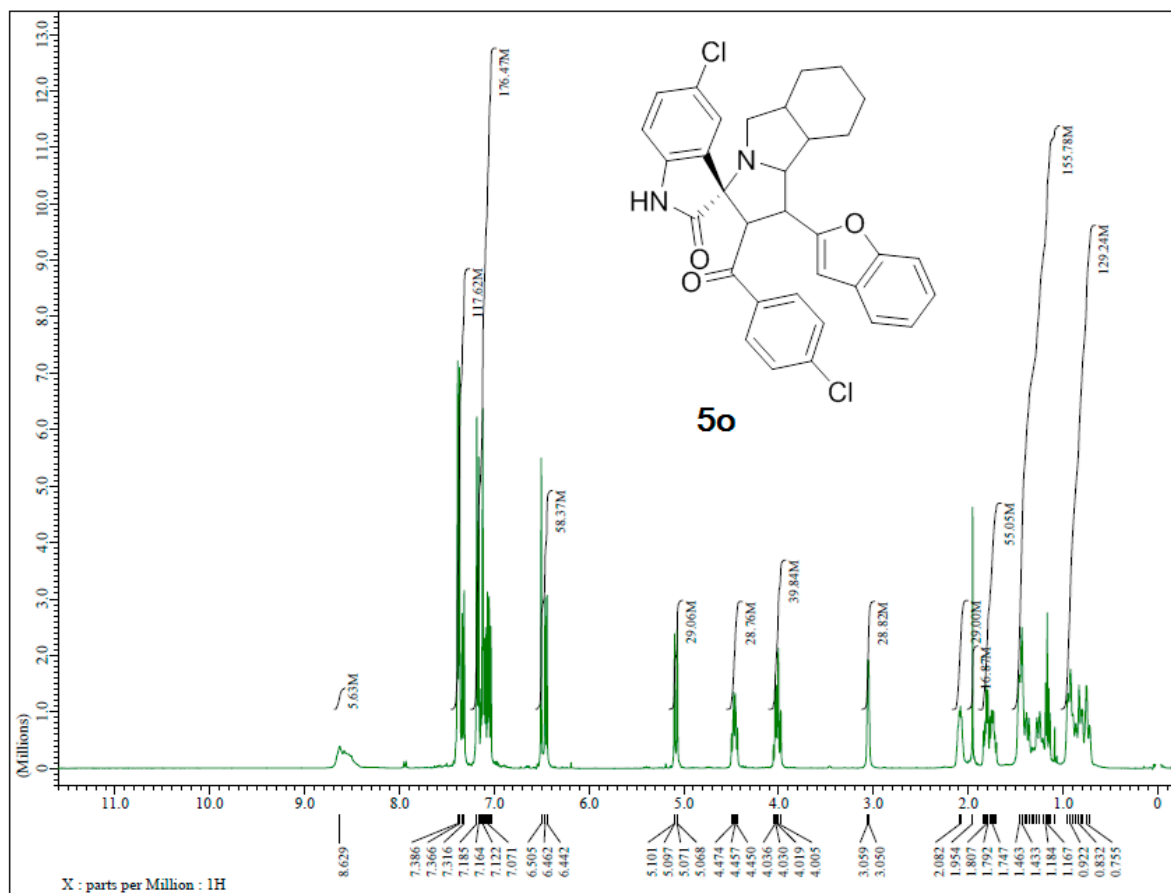

Figure S46. <sup>1</sup>H-NMR (400 MHz, CDCl<sub>3</sub>) of compound **5o**

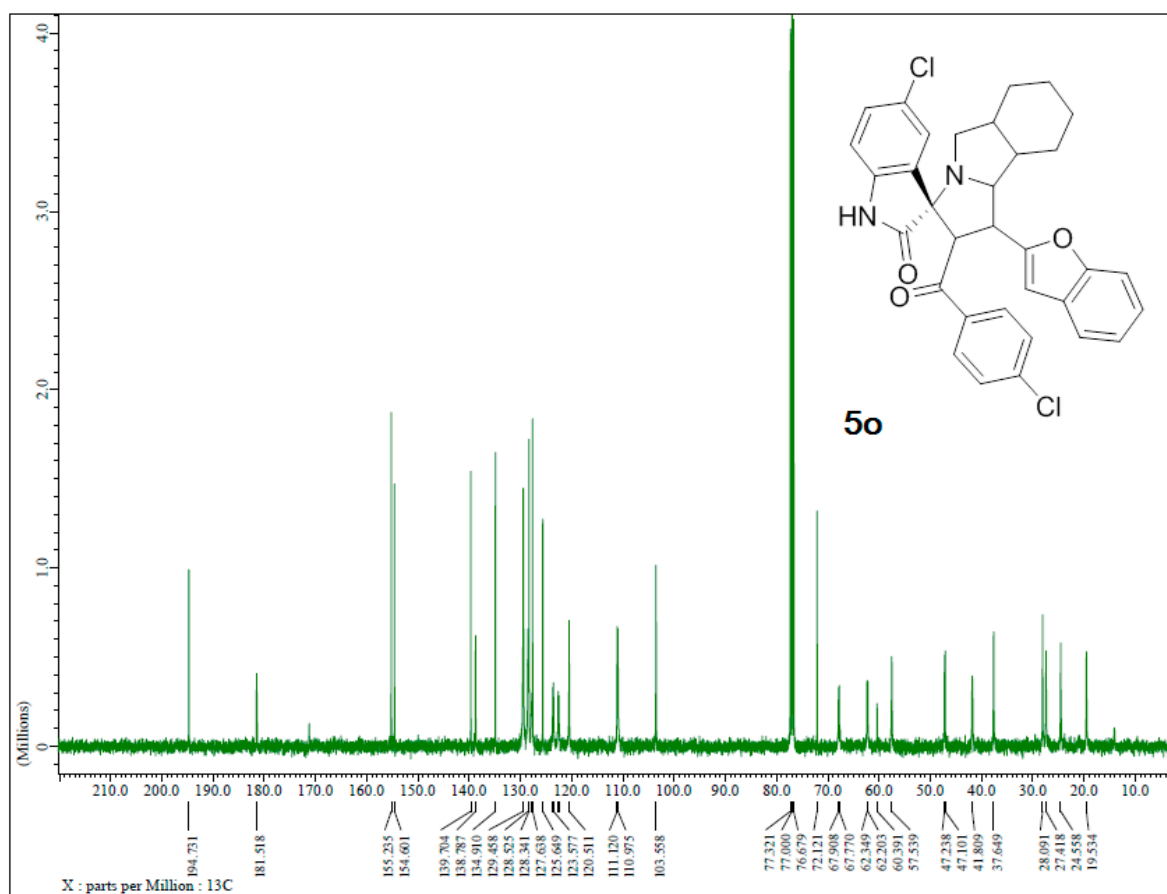

Figure S47. <sup>13</sup>C-NMR (100 MHz, CDCl<sub>3</sub>) of compound **5o**

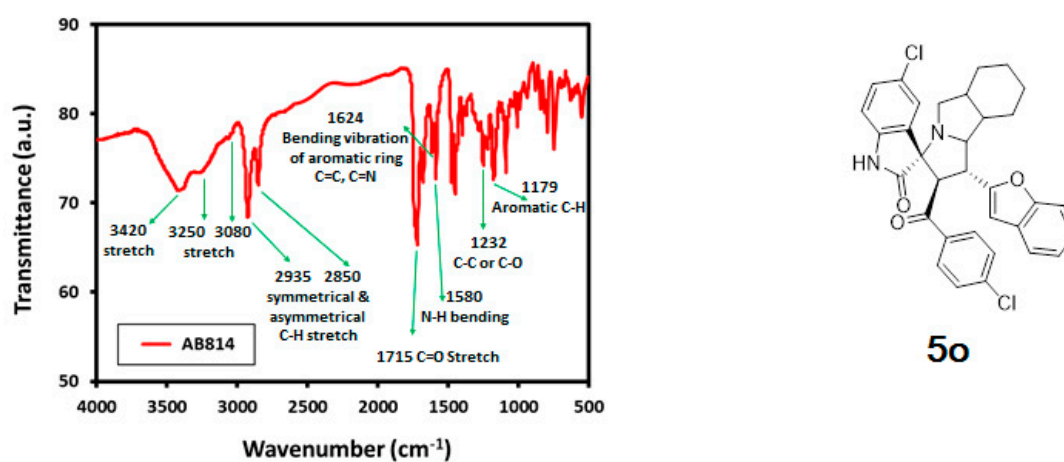

Figure S48. IR (KBr, cm<sup>-1</sup>) of compound **5o**



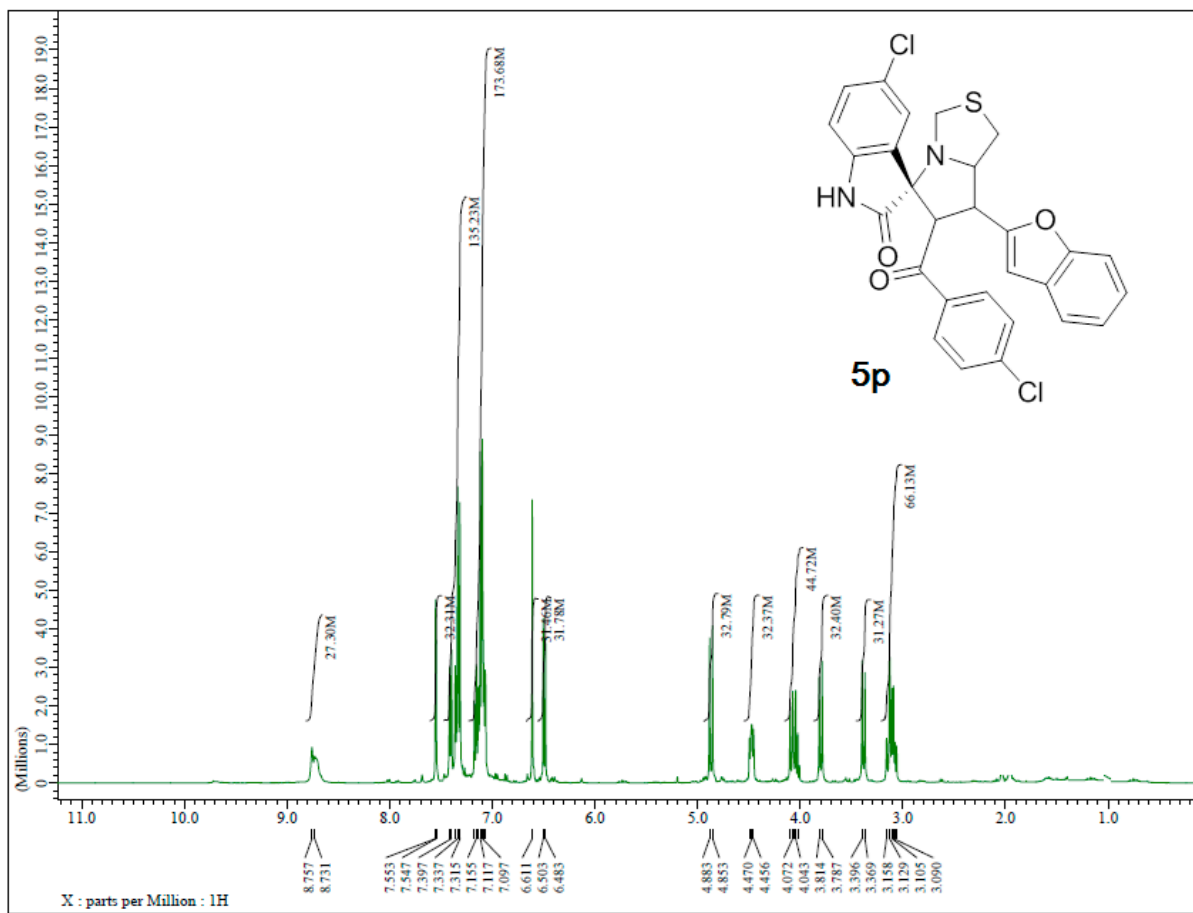

Figure S49.  $^1\text{H-NMR}$  (400 MHz,  $\text{CDCl}_3$ ) of compound **5p**

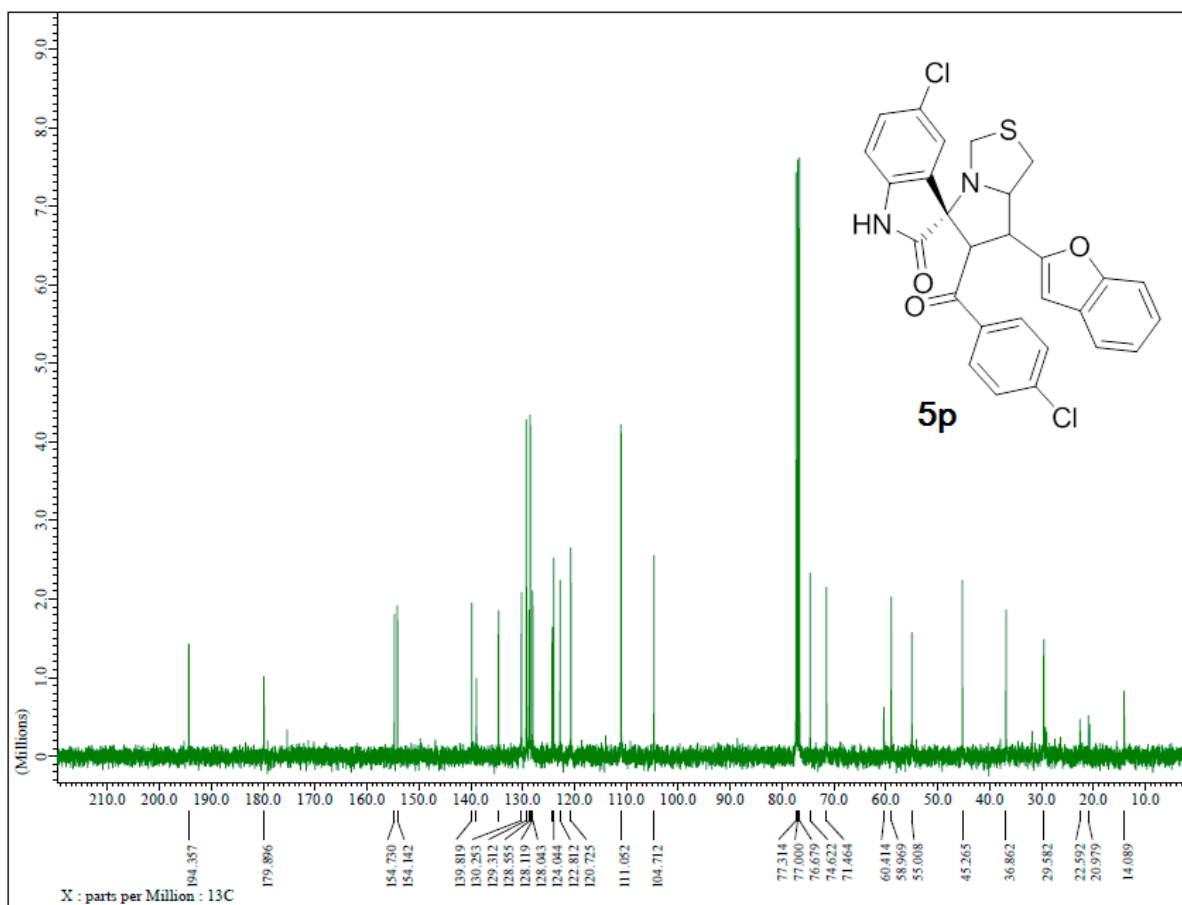

Figure S50. <sup>13</sup>C-NMR (100 MHz, CDCl<sub>3</sub>) of compound 5p

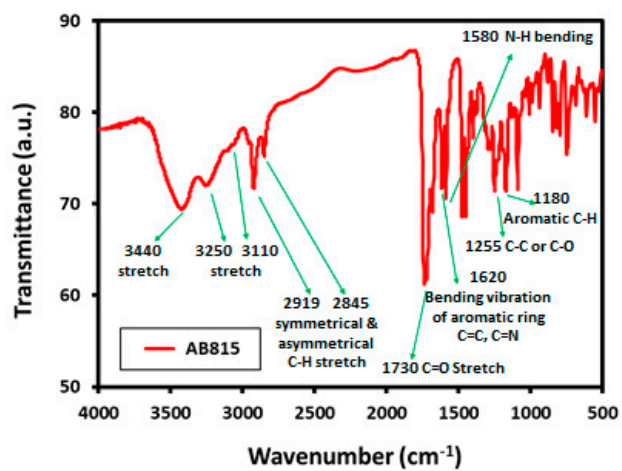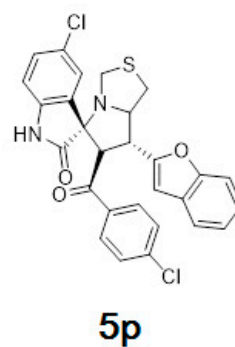

Figure S51. IR (KBr, cm<sup>-1</sup>) of compound **5p**

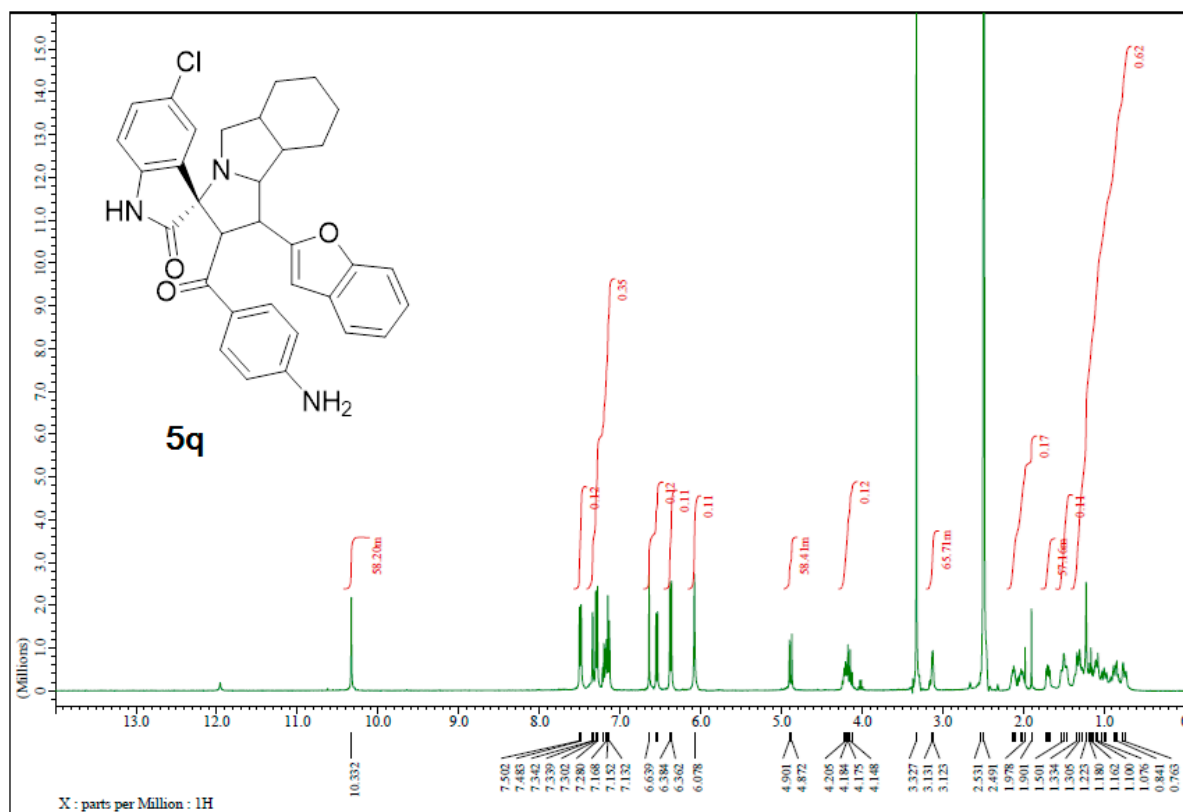

Figure S52. <sup>1</sup>H-NMR (400 MHz, DMSO-*d*<sub>6</sub>) of compound 5q

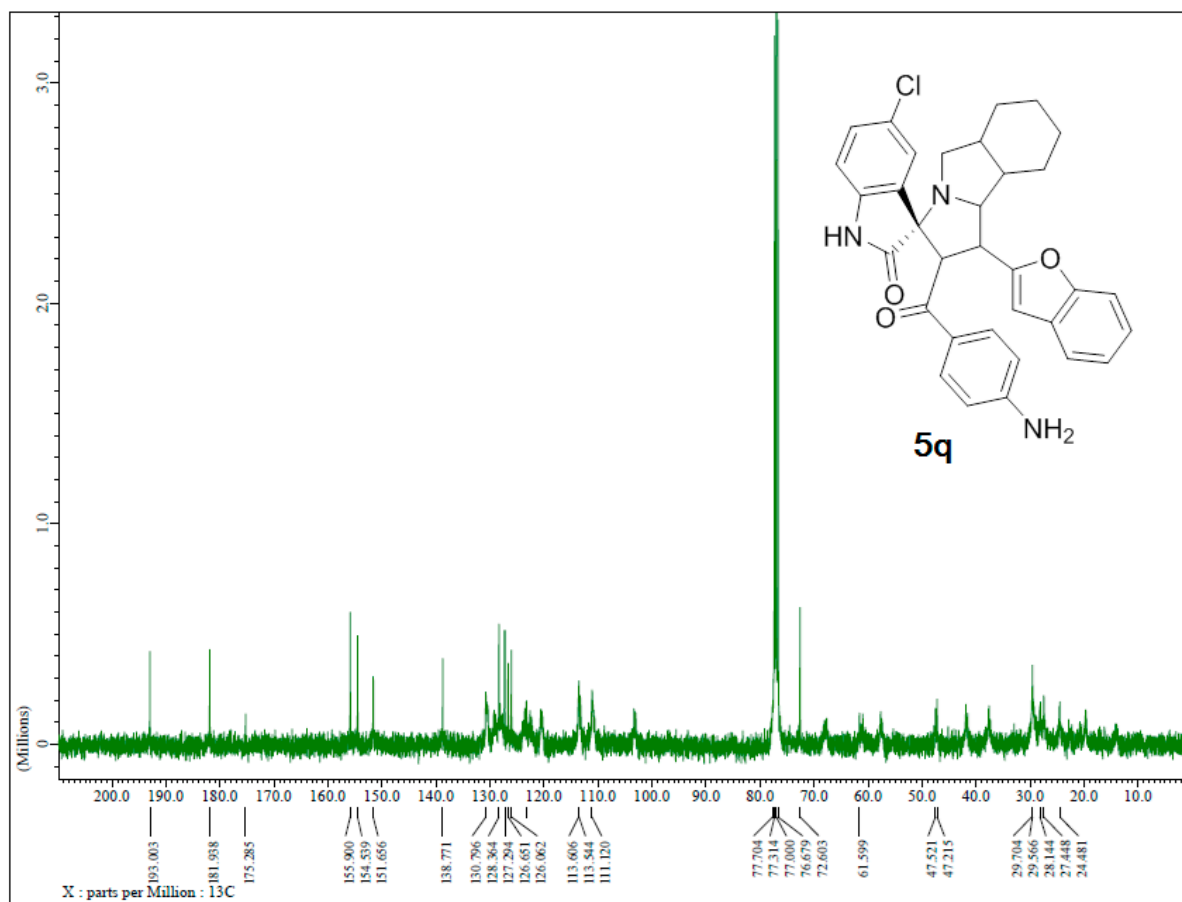

Figure S53. <sup>13</sup>C-NMR (100 MHz, CDCl<sub>3</sub>) of compound 5q

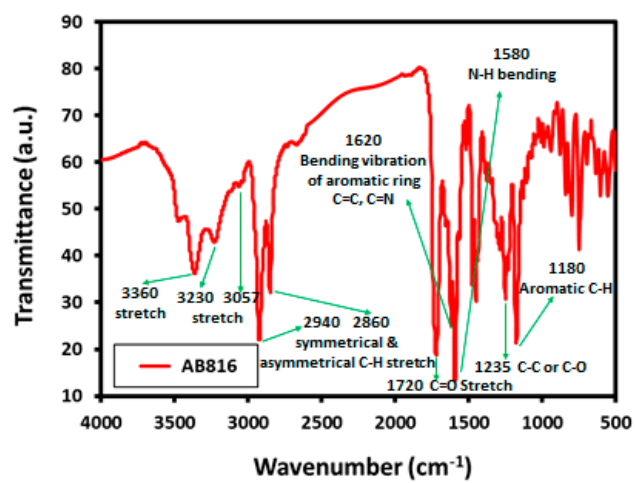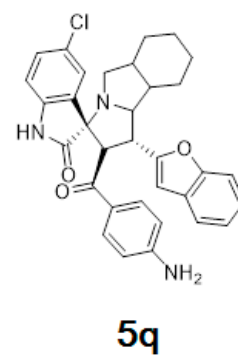

Figure S54. IR (KBr, cm<sup>-1</sup>) of compound 5q







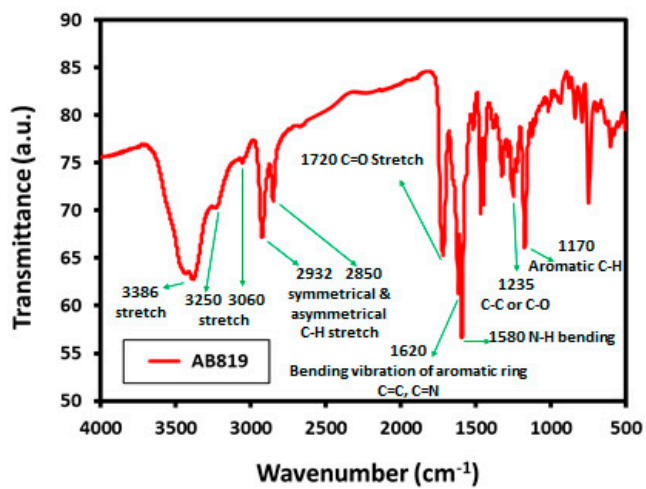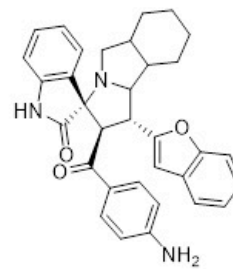

**5r**

**Figure S57.** IR (KBr, cm<sup>-1</sup>) of compound **5r**

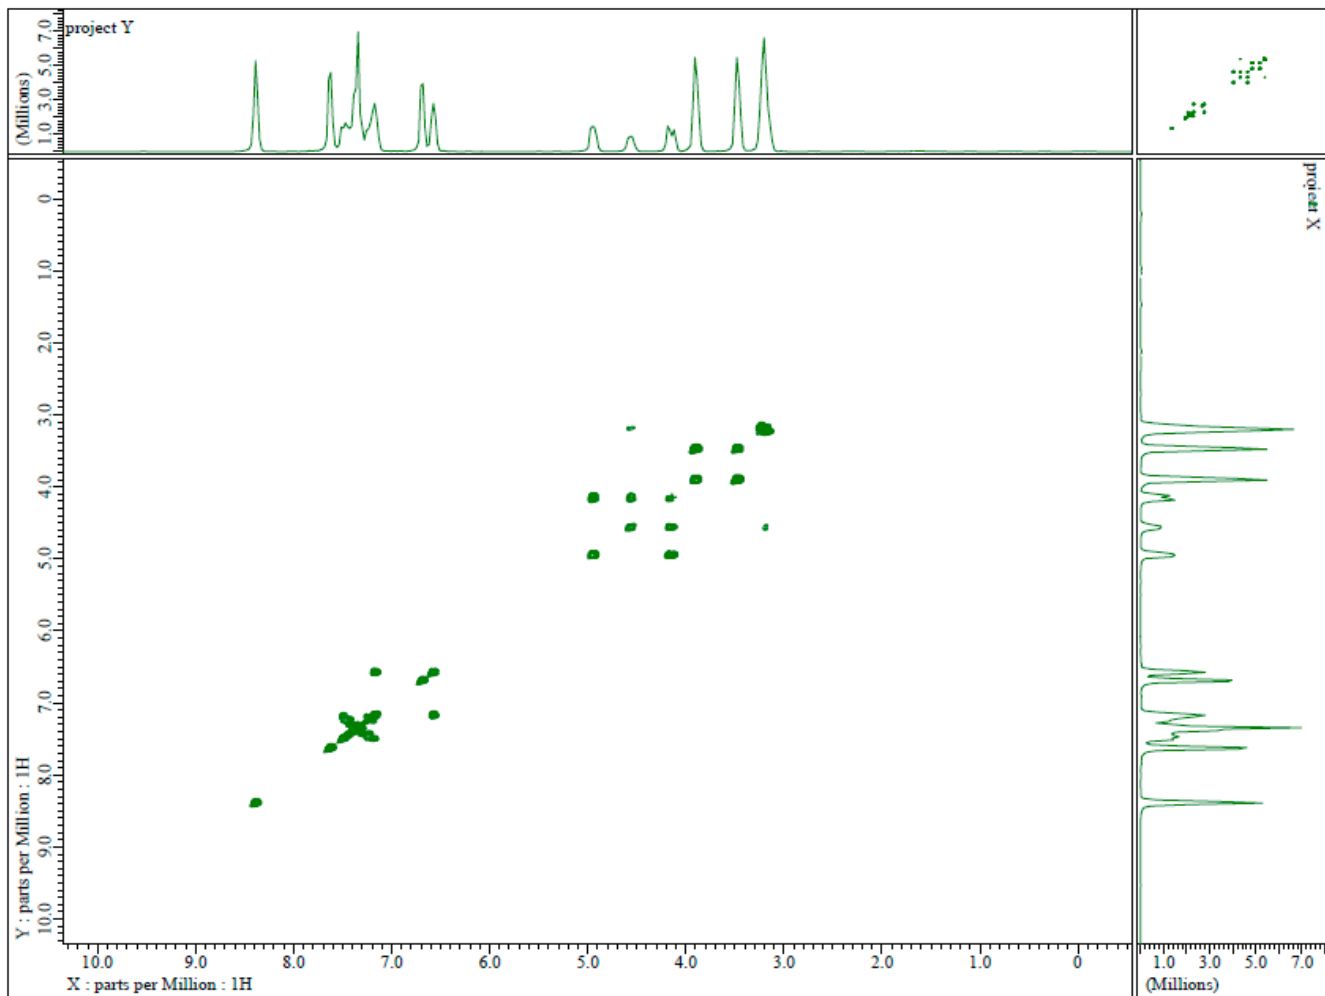

**Figure S58.** COSY (100 MHz, CDCl<sub>3</sub>) of compound 5i
